# Supplementary material
Source: PubMed Central journal article supplement (PMC6561194)
Supplement: pnas.1815197116.sapp.pdf [file pnas.1815197116.sapp.pdf]

## **Supplementary Information for**

### **Leptin in Hippocampus Mediates Benefits of Mild Exercise by an Antioxidant on Neurogenesis and Memory**

Jang Soo Yook, Randeep Rakwal, Junko Shibato, Kanako Takahashi, Hikaru Koizumi, Takeru Shima, Mitsushi J. Ikemoto, Leandro K. Oharomari, Bruce S. McEwen, and Hideaki Soya

Hideaki Soya

Email: [soya.hideaki.gt@u.tsukuba.ac.jp](mailto:soya.hideaki.gt@u.tsukuba.ac.jp)

Bruce S. McEwen

Email: [mcewen@mail.rockefeller.edu](mailto:mcewen@mail.rockefeller.edu)

#### **This PDF file includes:**

Detailed Materials and Methods

Figs. S1 to S6

Tables S1 to S8

References for SI reference citations

## Supplementary Information Text

### Detailed Materials and Methods

**Animals:** Male C57BL/6J mice (11-weeks-old) and male leptin-deficient (*ob/ob*) mice (5-weeks-old) were obtained from SLC (Shizuoka, Japan). All mice were housed in standard polycarbonate cages under a controlled room temperature (21-23°C), relative humidity (50%), and a 12-h light-dark cycle (lights on at 07:00 AM). The C57BL/6J mice (12-weeks-old) were randomly divided into 4 groups as follows: (1) sedentary with placebo (SE+PL), (2) mild exercise with placebo (ME+PL), (3) sedentary with AX supplementation (SE+AX), and (4) mild exercise with AX supplementation (ME+AX). The *ob/ob* mice (12 to 13-weeks-old) were randomly divided into 3 groups as follows: (1) SE+PL, (2) ME+PL, and (3) ME+AX. Animal care and experiments were performed in accordance with procedures approved by the University of Tsukuba Animal Experiment Committee.

**Mild exercise and Astaxanthin intervention:** Based on the ventilatory threshold (VT), we determined the intensity of treadmill running for both the WT and *ob/ob* mice (Fig. S6). Their running speed at VT was found to be 12.29 m/min and 8.66 m/min for the WT and *ob/ob* mice, respectively. The mice from the exercise groups (ME+PL and ME+AX) were submitted to mild treadmill exercise at intensity below their VT, and the sedentary groups (SE+PL and SE+AX) remained on the treadmill for the same amount of time without running. For chronic exercise training (4 weeks), C57BL/6J and *ob/ob* mice were habituated on a rodent treadmill (KN-73; Natsume, Japan) for 10 min before each running session, and then they ran following the appropriated running protocol, including 30 min/day and 5 times/week, as described in Table S1. Slight electric shocks at the rear of the treadmill were occasionally used during the running period. During the first week of acclimatization, all mice were fed a non-purified basal diet (MF powder diet, Oriental Yeast, Japan) *ad libitum*. Drinking water was also available *ad libitum*. During the 4 weeks of intervention, mice received a non-purified basal diet (MF powder; Oriental Yeast, Tokyo, Japan) with either AX or a placebo powder (AstaReal powder 20F based on 2% content of AX derived from *Haematococcus pluvialis*; AstaReal Co. Ltd, Tokyo, Japan) at concentrations of 0.5% (wt:wt), as reported in our previous study (1). Placebo

powder for AstaReal 20F contained an equivalent amount of medium chain triglycerides instead of AX. The composition of the experimental diets is shown in Table S8. Individual food intake and body weight were measured twice per a week.

**Surgical implantation of osmotic pump:** For the rescue experiment with chronic LEP administration, osmotic pump implantation was performed, as described previously (2). A micro-osmotic pump (0.11  $\mu\text{l/h}$ ; Alzet Model 1004, DURECT, USA) was filled with recombinant mouse leptin (0.1  $\mu\text{g/d}$ ; R&D Systems, USA) or aCSF (recipe can be found at [www.alzet.com](http://www.alzet.com)) 48 hours before surgery. The filled pump was then connected to a cannula *via* a plastic catheter using Alzet Brain Infusion Kit 3 (DURECT). The *ob/ob* mice were anesthetized with isoflurane and placed on a heating pad set on the stereotaxic frame (Narishige, Japan). The pump was inserted into a subcutaneous pocket that was generated on the back of the mice and the cannula was stereotaxically implanted in the right lateral ventricle at the following coordinates: AP = -0.5 mm, ML = -1.1 mm, DV = -2.5 mm. The cannula was secured with super glue (Loctite 454; Henkel, Düsseldorf, Germany). The mouse remained on the heating pad until regaining consciousness and housed individually in polycarbonate cages before the combined intervention (ME+AX).

**Morris water maze:** To evaluate spatial learning and memory, the WT and *ob/ob* mice were tested using the MWM test during the final week of the intervention (1). White, non-toxic paint was added to a black plastic circular pool (150 cm in diameter, 45 cm depth, Bio Research Center, Japan) containing opaque water (20-22°C), and a round platform was hidden 0.5 cm below the surface and positioned in one of the four quadrants. The WT and *ob/ob* mice were trained for 4 and 5 consecutive days, respectively. All mice received four trials per day with 10-min inter-trial intervals during the acquisition period. As described elsewhere, one of four starting positions was randomly selected for each trial based on a semi-random set of start locations. In each acquisition trial, mice were trained to find the hidden platform with a maximum time limit of 60 sec, and then they were allowed to remain on the platform for 10 sec. If a mouse was still swimming after a given trial it was gently placed on the platform by the experimenter and allowed to rest for 10 sec prior to being returned to the home cage. Mice were submitted to the probe test

24 hours after the last training session, in which the platform was removed from the pool and the mice, were allowed to search for it during a 60-sec time interval. The total amount of time spent in each quadrant was recorded. The parameters of behavior for each acquisition trial and probe test were recorded with a video tracking system (SMART, Polyvalent video-tracking system, 35C67-AC5, PANLAB, Spain). The time the animals took to reach the platform was recorded (latency, path length, and swim speed) with Ethovision 3.0 software (Noldus, Netherlands).

**Sample collection:** To evaluate AHN, mice were deeply anaesthetized with sodium pentobarbital (100 mg/kg, *i.p.*) and transcardially perfused with 0.9% saline. After perfusion, the brains were immediately removed from the skull, and fixed in a commercial 4% paraformaldehyde (PFA) solution (Nacalai Tesque, Kyoto, Japan) at 4°C for 24 hours. After the fixation step, brains were sequentially equilibrated in a 10%, 20%, and 30% sucrose gradient contained in a 0.1 M phosphate buffer (PB), and then frozen on powdered dry ice. Coronal sections of 50 µm were sequentially cut through the entire hippocampus using a cryostat (HM505E; MICROM) and stored in antifreeze solution (30% glycerol and 30% ethylene glycol in 0.1 M PB) at -30°C until the next analysis for immunohistochemistry. For DNA microarray, semi-quantitative RT-PCR, and western blot analyses, the brains were removed from the skull and the hippocampi were rapidly dissected upon cold petri dishes, and immediately flash-frozen in liquid nitrogen. The samples were stored at -80°C before being further processed. Stored hippocampi were ground to a very fine powder using a precooled mortar and pestle with liquid nitrogen, as described previously (3). The powdered samples were stored at -80°C until further analyses. The samples were collected one day after the last day of the intervention period to avoid acute effects of the intervention.

**DNA microarray analysis:** Total RNA was extracted from the finely powdered hippocampal tissue of C57BL/6J mice ( $n = 8/\text{group}$ ) using the QIAGEN RNeasy Mini Kit (QIAGEN, USA). The quantity and quality of extracted total RNA was determined with spectrophotometric analysis (NanoPhotometer<sup>TM</sup>; IMPLLEN, Germany) (Fig. S1A) and the subunits were visualized using formaldehyde-agarose gel electrophoresis (Fig.

S1B). In order to identify differential gene expressions, we performed DNA microarray analysis using the method described in a previous study with a slight modification (4). An equal amount of total RNA (800 ng) that extracted from eight randomly chosen powdered tissues ( $n=8$ /group) was pooled in each group (SE+PL, ME+PL, and ME+AX) prior to DNA microarray analysis. The rest of individual RNAs stored at  $-80^{\circ}\text{C}$  to validate the DNA microarray-based gene expressions using semi-quantitative RT-PCR. Total RNAs (600 ng; each replicate pooled together) were labeled with Cy3 and Cy5 dye using an Agilent Low RNA Input Fluorescent Linear Amplification Kit (Agilent Technologies, USA). A SurePrint G3 Mouse GE 8X60K Microarray Kit (G4858AF, Agilent Technologies, USA) was used for global gene expression analysis with two-color dye labeling on a single microarray chip (Fig. S1C). Fluorescently labeled targets of control (SE+PL) as well as interventions (ME+PL and ME+AX) were hybridized to the same microarray slide with 60-mer probes. The microarray was then scanned using an Agilent Microarray scanner G2505C after wash processes according to the manufacturer's instructions. The slide image was measured by Agilent Feature Extraction software (version 11.0.1.1) to gain significantly differentially expressed genes. In brief, this program measured Cy3 and Cy5 signal intensities of whole probes. Dye-bias tends to be signal intensity dependent, and therefore the software selected probes using a set by rank consistency filter for dye normalization. The normalization was performed by LOWESS (locally weighted linear regression), which calculates the log ratio of dye-normalized Cy3 and Cy5 signals, as well as the final error of the log ratio. The significance  $p$ -value was based on the propagate error and universal error models. The threshold of significance for differentially expressed genes was  $< 0.01$  (for the confidence that the feature was not differentially expressed), and erroneous data generated owing to artifacts were eliminated before data analysis using the software. The outputs of microarray analysis used in this study are available under the series number GSE 107314 at the NCBI Gene Expression Omnibus (GEO) public functional genomics data repository (<https://www.ncbi.nlm.nih.gov/geo/query/acc.cgi?acc=GSE107314>).

**Ingenuity Pathways Analysis:** To identify biological function and network of hippocampus-specific genes, we applied Ingenuity Pathways Analysis (IPA, Ingenuity®

Systems, www.ingenuity.com) with tissue-specific gene expression. The dataset from the DNA microarray, which comprises the differentially expressed ( $\geq/\leq$  1.5/0.75-fold compared to SE+PL group) genes, and their corresponding fold-change values were uploaded as an Excel data sheet to the web-based IPA software. To obtain gene networks, genes were overlaid onto a global molecular network developed from information contained in the Ingenuity Knowledge Base. The functional analysis identified the biological functions that were most significant to the data set ( $P < 0.05$ ) according to a right-tailed Fisher's exact test. A functional annotation of the up- and down-regulated genes is summarized in Table S2-S5.

**Semi-quantitative RT-PCR:** To validate changed gene expression in the DNA microarray analysis, semi-quantitative (sq) RT-PCR was used in this study. Briefly, cDNA synthesized from independent total RNA (800 ng) samples using an Affinity Script QPCR cDNA Synthesis Kit (Agilent Technologies, USA) according to the manufacturer's protocol. The reaction mixture contained 0.6  $\mu$ L of the first-strand cDNA, 7 pmols of each primer set and 6.0  $\mu$ L of the Emerald Amp PCR Master Mix (2 $\times$ premix) (TaKaRa Shuzo, Japan) in a total volume of 12  $\mu$ L. Thermal-cycling (C1000<sup>TM</sup> Thermal Cycler; Bio-Rad Laboratories, USA) parameters were as follows: after an initial denaturation at 97°C for 5 min, samples were applied to a cycling regime with 22-32 cycles. After completion of the PCR, the total reaction mixture was spun down and mixed (3  $\mu$ L) before being loaded into the wells of a 1.6% agarose (Nacalai Tesque, Japan) gel. Electrophoresis was then performed for 20 min at 100 volts in a 1 $\times$ TAE buffer (Wako, Japan) using a Mupid-exU electrophoresis system (ADVANCE, Japan). The gels were stained for 7 min with ethidium bromide, and the stained bands were visualized using the Image Quant LAS 4000 system (GE Healthcare, Japan). Primer sequences for each primer are shown in the list of primer design for sqRT-PCR.

#### Primer design for semi-quantitative RT-PCR

| Gene | Nucleotide sequence | Nucleotide sequence | Product |
|------|---------------------|---------------------|---------|
|------|---------------------|---------------------|---------|

| symbol        | forward                       | reverse                        | size (bp) |
|---------------|-------------------------------|--------------------------------|-----------|
| <i>ActinB</i> | 5'-acgttgacatccgtaaagacct-3'  | 5'-gggtgtaaaacgcagctcagtaa-3'  | 302       |
| <i>Lep</i>    | 5'-gtagccctgaatgctgaagtt-3'   | 5'-ggatgggatggctcttatctct-3'   | 278       |
| <i>Stat3</i>  | 5'-agaaaatgaaggtggggagaa-3'   | 5'-cgtactccattgctgacaagag-3'   | 213       |
| <i>Mapk1</i>  | 5'-gatcacacaggggttcttgacag-3' | 5'-gcgggagagaaaagcaaatagtt-3'  | 271       |
| <i>Akt</i>    | 5'-gttcacagctcagatgatcacc-3'  | 5'-acagtagaaaacatcctcccctg-3'  | 273       |
| <i>Igf1r</i>  | 5'-tcctagctgatgttgcctacc-3'   | 5'-catatgtgggtaactggcagtg-3'   | 317       |
| <i>Lepra</i>  | 5'-gtgctgtggagtcactcagtg-3'   | 5'-agtcattcaaaccattagtttagg-3' | 595       |
| <i>Leprb</i>  | 5'-gatatttggctcttctctctgg-3'  | 5'-agttgtggtgaaatcatggtggg-3'  | 437       |

**Western blotting:** The frozen hippocampi were placed in liquid nitrogen, and ground to a very fine powder with a mortar and pestle. The tissue powder was subsequently solubilized in an appropriate lysis buffer containing thiourea and Tris (LB-TT) for extraction of hippocampal protein (5). The total protein solution was precipitated using the ProteoExtract Protein Precipitation Kit (Calbiochem, Germany) for the concentration and clean up. Protein concentration was determined with a Bio-Rad Protein Assay Dye Reagent Concentrate (Bio-Rad, USA) using bovine serum albumin (BSA) as a standard and a NanoPhotometer<sup>TM</sup> spectrophotometer (IMPLEN). The proteins in SDS were heated to 98°C for 10 min, rapidly cooled to 4°C for 1 min, and then were loaded on an appropriate percentage of polyacrylamide gel (ATTO, Japan) by electrophoresis. The gel was then transferred to a PVDF membrane using the Trans-Blot Turbo<sup>TM</sup> Transfer System (Bio-Rad). The membranes were blocked for 1 h at room temperature with 5% non-fat skim milk in 1×Tris-buffered saline containing 0.1% Tween-20 (TBS) to reduce non-specific binding and then incubated for overnight at 4°C with one of the following diluted primer antibodies: rabbit polyclonal anti-LEPR (1:500, ab5593, Abcam), rabbit polyclonal anti-phospho-IGF-1 Receptor  $\beta$  (1:500, #3024, Cell Signaling), rabbit

polyclonal anti-IGF-1 Receptor  $\beta$  (1:500, #3027, Cell Signaling), rabbit polyclonal anti-LEP (1:500, ab3583, Abcam), rabbit polyclonal anti-AKT (1:2,000, #9272, Cell Signaling), rabbit polyclonal anti-phospho-AKT (1:2,000, #9271, Cell Signaling), mouse monoclonal anti-STAT3 (1:1,000, #9139, Cell Signaling), rabbit polyclonal anti-PI3K (1:2,000, #4292, Cell Signaling), rabbit polyclonal anti-phospho-PI3K (1:2,000, #4228, Cell Signaling), mouse monoclonal anti-STAT3 (1:10,000, #9139, Cell Signaling), mouse monoclonal anti-pho-STAT3 (1:500, sc-136193, Santa Cruz Biotechnology), or mouse monoclonal  $\beta$ -actin (1:50,000, A5441, Sigma-Aldrich). After the membranes were washed with 1 $\times$ TBS buffer, they were incubated for 1 hour at room temperature with secondary antibodies: horseradish peroxidase (HRP)-conjugated goat anti-rabbit (1:10,000, sc-2004, Santa Cruz Biotechnology) was used for LEP, LEPR, pho-IGF1R, IGF1-R, pho-AKT, AKT, PI3K, and pho-PI3K, and HRP-conjugated goat anti-mouse (sc-2005, Santa Cruz Biotechnology) was used for pho-STAT3, STAT3 (1:10,000) and  $\beta$ -actin (1:50,000). After washing with 1 $\times$ TBS, the membranes were developed using a Chemi-Lumi One Super Kit (Nacalai Tesque, Japan) following the manufacturer's instructions. The density of the developed bands was scanned and then quantified using image analysis software (Image Quant LAS 4000 system).

**ELISA assays:** Blood was collected in heparinized tubes by cardiac puncture and immediately placed on ice and centrifuged at 3,000 rpm for 15 min at 4°C. The plasma samples were stored at -80°C until further analysis. Leptin concentrations in plasma were measured using a Mouse/Rat Leptin Quantikine ELISA Immunoassay Kit (SMOB00, R&D Systems) according to the manufacture's protocol. Briefly, frozen samples were



defrosted and then diluted 1:20 with Calibrator Diluent RD5-3. Samples were loaded in duplicate on the plate and incubated according to manufacturer's assay procedure. The plate was measured with a fluorescence microplate reader (ARVO X4, PerkinElmer, Groningen, Netherlands).

**Cell cultures of AX:** SH-SY5Y cells were incubated with Dulbecco's modified Eagle's medium (DMEM) containing 15% fetal bovine serum at 37°C in 5% CO<sub>2</sub> in an incubator. Cells were plated into 96-well plates at a density of  $2\sim3 \times 10^4$  cells/dish. The experimental cells were treated with various concentrations of AX (5, 10, and 20 μM) or DMSO for 1 hour. After removal of AX-treated medium, the cells were re-incubated in Opti-MEM without H<sub>2</sub>O<sub>2</sub> for 1 hour, 6 hours, and 24 hours. The cell viability was measured by LDH assay (LDH-Cytotoxic Test Wako for Cytotoxicity; Wako Pure Chemical Industries) that monitored the reduction of pyruvic acid. The absorbance of each sample was determined at 570 nm with a microplate reader. For western blot analysis, AX or DMSO-treated SH-SY5Y cells were washed with PBS, and then collected the cells by PBS including 10 mM EDTA. After centrifugation for 10 min at 3,000 rpm, the pellets were dissolved in RIPA buffer containing protease inhibitor (Nacalai Tesque). For western blot analysis, the experimental cells were treated to fresh Opti-MEM containing various concentrations of astaxanthin (5, 7.5, 10, and 20 μM) or 0.5% DMSO as a vehicle for 1 hour. DMSO and AX-treated cells were lysed in RIPA lysis buffer (Nacalai Tesque) containing phosphatase inhibitor cocktail and protease inhibitor cocktail. Lysates were clarified by centrifugation at 3,000 rpm for 5 min, and the total protein content was determined using a Bio-Rad Protein Assay Dye Reagent

Concentrate (Bio-Rad, USA). Equal amounts (20 µg) of protein extracts were subjected to 15% of polyacrylamide gel (ATTO, Japan) and a PVDF membrane using the Trans-Blot Turbo™ Transfer System (Bio-Rad); rabbit polyclonal anti-LEP (1:4,000, PA1-052, Invitrogen) for primary antibody and HRP-conjugated goat anti-rabbit (1:10,000, sc-2004, Santa Cruz Biotechnology) for secondary antibody.

**Statistical analyses:** All data are presented as mean ± standard error (SEM). Escape latency, escape length and swimming speed for the MWM were analyzed with a repeated-measures two-way ANOVA, followed by Bonferroni's multiple comparison tests for *post-hoc* analysis. The results of the immunohistochemistry, probe test, western blots, and ELISA were analyzed using two-way ANOVA followed by Fisher's LSD *post-hoc* test. The results for sqRT-PCR were analyzed using one-way ANOVA followed by Fisher's LSD *post-hoc* test. One-way ANOVA with Fisher's LSD *post-hoc* test was used for the probe test and western blots of the *ob/ob* mice study. Correlations between spatial memory and the expression of protein were calculated using Pearson's correlation analysis. Statistically significant differences were evaluated at  $P < 0.05$ .

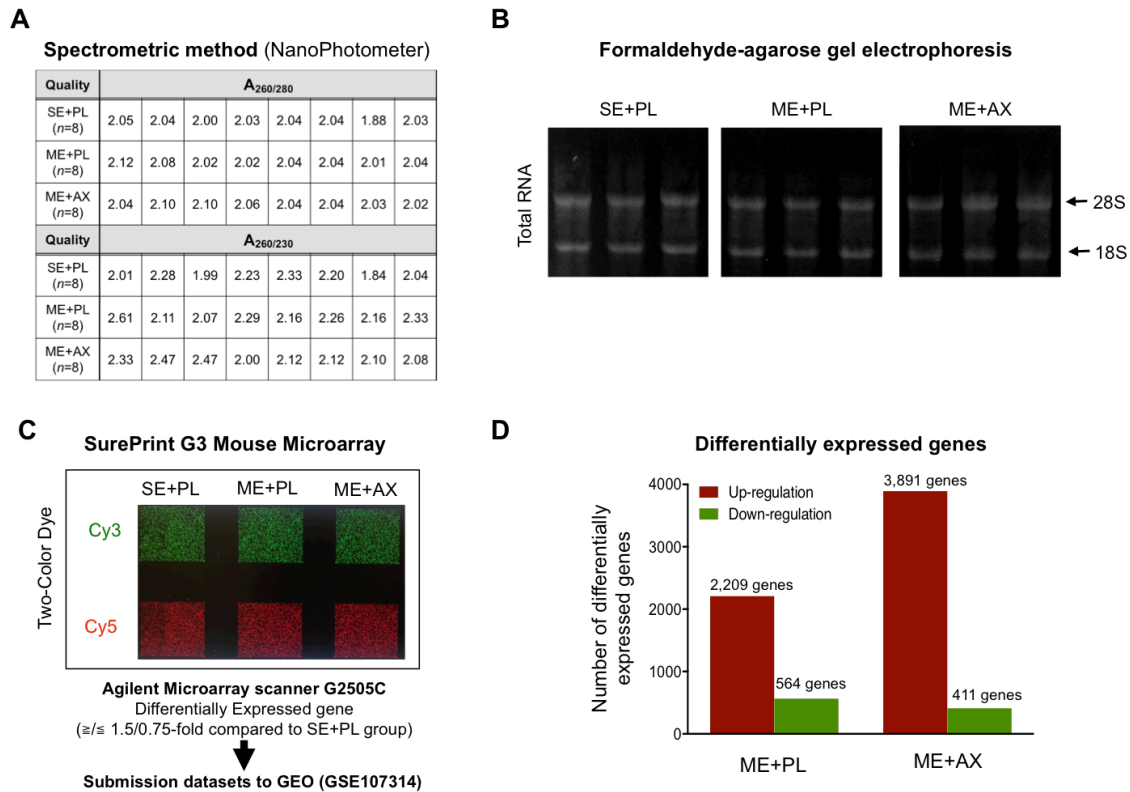

**Fig. S1. Assessment of RNA integrity and experimental design for DNA microarray.** (A) The quality of total RNA was determined using a spectrometric measurement of absorbance with a NanoPhotometer<sup>TM</sup> (IMPLEN, Germany). The A<sub>260/280</sub> and A<sub>260/230</sub> ratio in all samples ( $n = 8/\text{group}$ ) was greater than 1.8, respectively, which is a commonly accepted value for high RNA quality. (B) The integrity of RNA was assessed by inspection of the 28S and 18S ribosomal RNA bands using formaldehyde-agarose gel electrophoresis stained with ethidium bromide. (C) A SurePrint G3 Mouse GE 8X60K Microarray Kit (Agilent Technologies, G4858A) was used for the global gene expression profiling in the hippocampus, with two-color labeling method on a single microarray chip. The data set from the microarray consisted of the differentially expressed genes ( $\cong/\cong 1.5/0.75\text{-fold}$  compared to SE+PL group). (D) DNA microarray analysis using cut-off values ( $\cong/\cong 1.5/0.75\text{-fold}$ ) revealed 2,209 and 564 up- and down-regulated genes in ME+PL group, respectively. Interestingly, a much higher number of changes appeared in the combined intervention (ME+AX group), where 3,891 and 411 up- and down-regulated genes were altered.

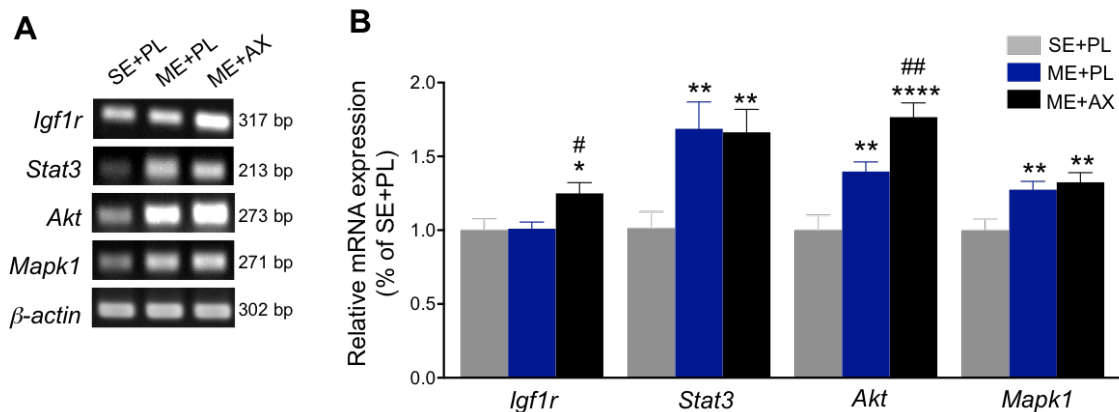

**Fig. S2. Validation of specific gene expression by sqRT-PCR.** (A) Gel-images on top present the representative PCR product bands. (B) Both the ME alone and the combined ME with AX significantly increased *Stat3* ( $F_{(2, 20)} = 5.37$ ,  $P < 0.05$ ), *Akt* ( $F_{(2, 20)} = 18.37$ ,  $P < 0.0001$ ) and *Mapk1* mRNA expression ( $F_{(2, 20)} = 6.89$ ,  $P < 0.01$ ). *Igf1r* mRNA ( $F_{(2, 20)} = 6.89$ ,  $P < 0.01$ ) was only increased in the combined intervention. Data are shown as protein levels relative to SE+PL group, presented the means  $\pm$  SEM ( $n = 6-8$ /group). \* $P < 0.05$ , \*\* $P < 0.01$ , \*\*\* $P < 0.001$ , \*\*\*\* $P < 0.0001$  vs. SE+PL. # $P < 0.05$ , ## $P < 0.01$  vs. ME+PL.

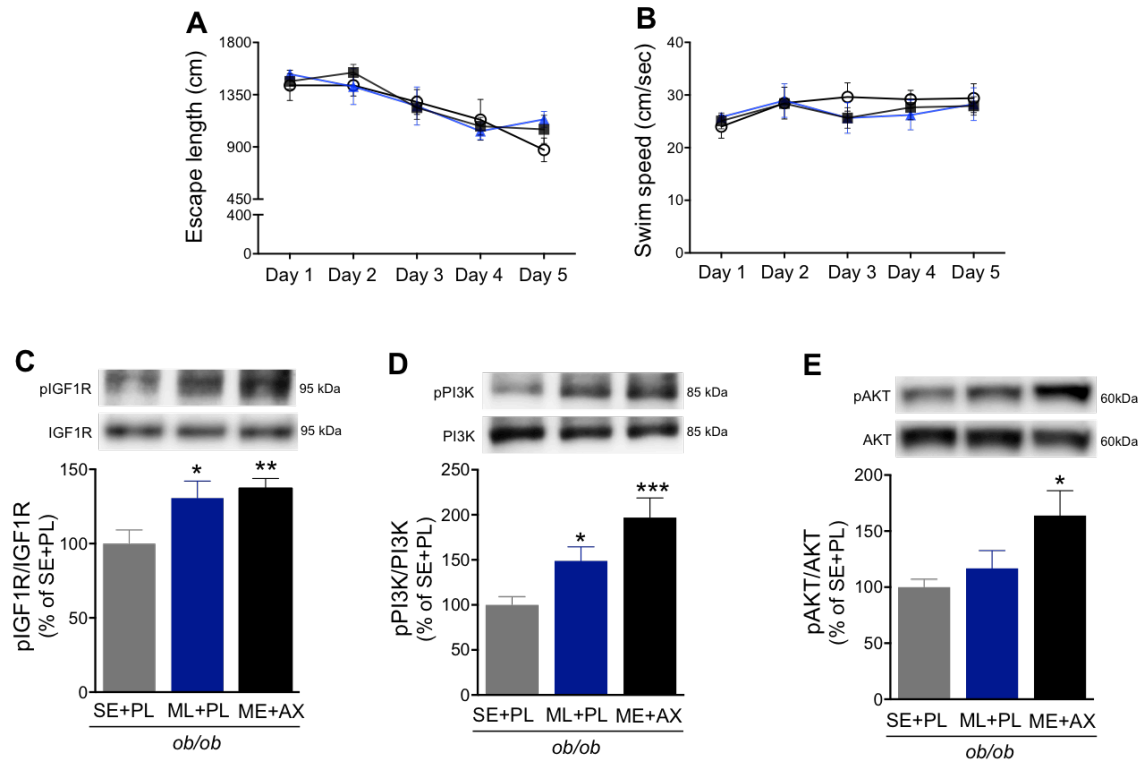

**Fig. S3. Spatial learning and IGF1R signaling on the hippocampus of *ob/ob* mice.** (A and B) There was no difference between any of the groups in the escape latency of the acquisition period. ME alone increased pIGF1R in the hippocampus of WT mice (Fig 3 D and E). Therefore, we checked whether hippocampal IGF1R signaling is involved in the ME alone-enhanced memory functions in the *ob/ob* mice. (C and D) Both ME+PL and ME+AX groups significantly increased pIGF1R ( $F_{(2, 18)} = 4.56$ ,  $P < 0.05$ ) and pPI3K ( $F_{(2, 18)} = 8.83$ ,  $P < 0.01$ ) protein abundances, compared to SE+PL group. (E) The level of pAKT protein was only increased in the ME+AX group ( $F_{(2, 18)} = 4.17$ ,  $P < 0.05$ ). Protein levels were normalized to the band intensity of  $\beta$ -actin. All data are presented as mean  $\pm$  SEM. One-way ANOVA with Fisher's LSD *post-hoc* test were performed. \* $P < 0.05$ , \*\* $P < 0.01$ , \*\*\* $P < 0.001$  vs. SE+PL.

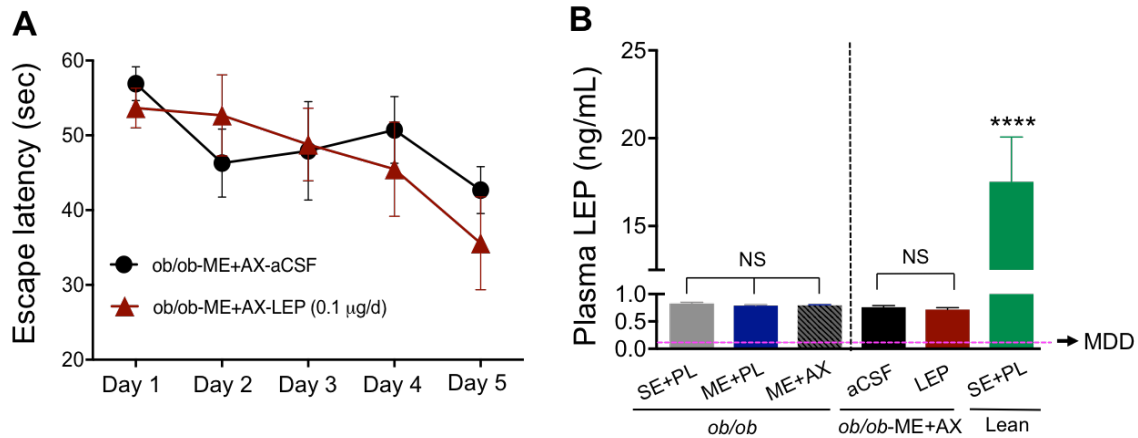

**Fig. S4. Spatial learning and plasma LEP of *ob/ob* mice by administration of LEP.**

(A) The *ob/ob* mice were continuously administered with LEP (0.1 μg/day) or aCSF (control) during the 4 weeks of combined intervention ( $n = 5/\text{group}$ ). There was no significant difference in escape latency of the Morris water maze test ( $F_{(1, 8)} = 0.12$ ,  $P = 0.73$ ). Repeated-measures two-way ANOVA with Bonferroni's *post-hoc* test was performed. (B) Plasma LEP in *ob/ob* mice was almost undetectable compared to lean mice with SE+PL ( $n = 3$ ) and there were no significant increases in response to chronic LEP administration and intervention. The minimum detectable dose (MDD) of ELISA kit is 0.022 ng/mL (Pink dotted line). One-way ANOVA with Tukey's *post-hoc* test was performed (\*\*\*\* $P < 0.0001$  vs. aCSF or LEP group). All data are presented as mean  $\pm$  SEM. NS: not significant.

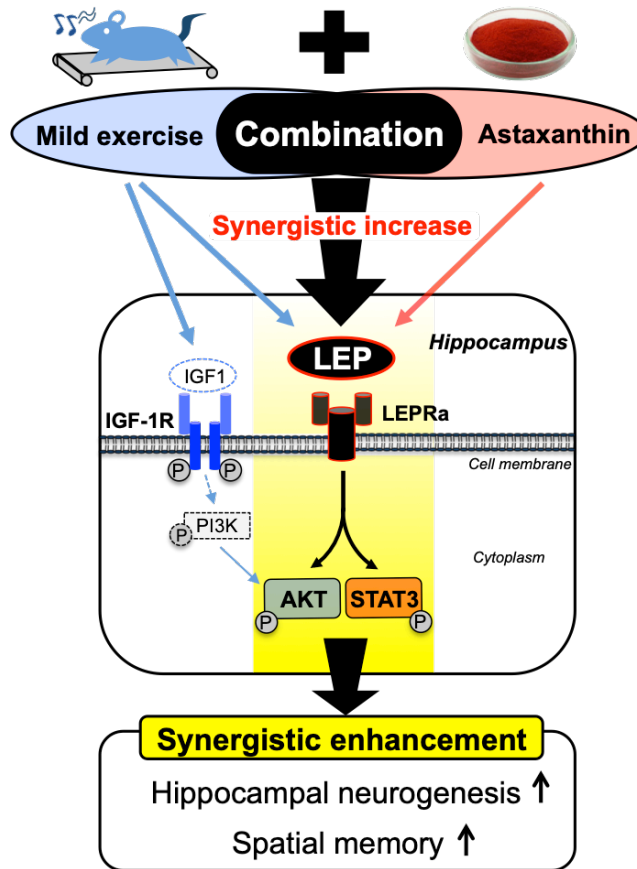

**Fig. S5. A hypothetical molecular mechanism by which the ME combined with AX can induce synergistic effects on AHN and spatial memory.** Activation of IGF1R/AKT pathway is involved in the ME-alone-enhanced hippocampal neurogenesis and memory functions (blue line). By extension, ME combined with AX induces synergistic effects on hippocampal neurogenesis and spatial memory performance. The respective ME- and the AX-increased LEP expressions in the hippocampus are further enhanced by their combination (red line), suggesting that the synergistic increase of hippocampal leptin (h-LEP) mediates the combined-intervention-induced strong synergistic benefits on the hippocampus-based neurogenesis and spatial memory. Activation of the AKT/STAT3 pathway is also involved in the combined-intervention-enhanced hippocampal functions.

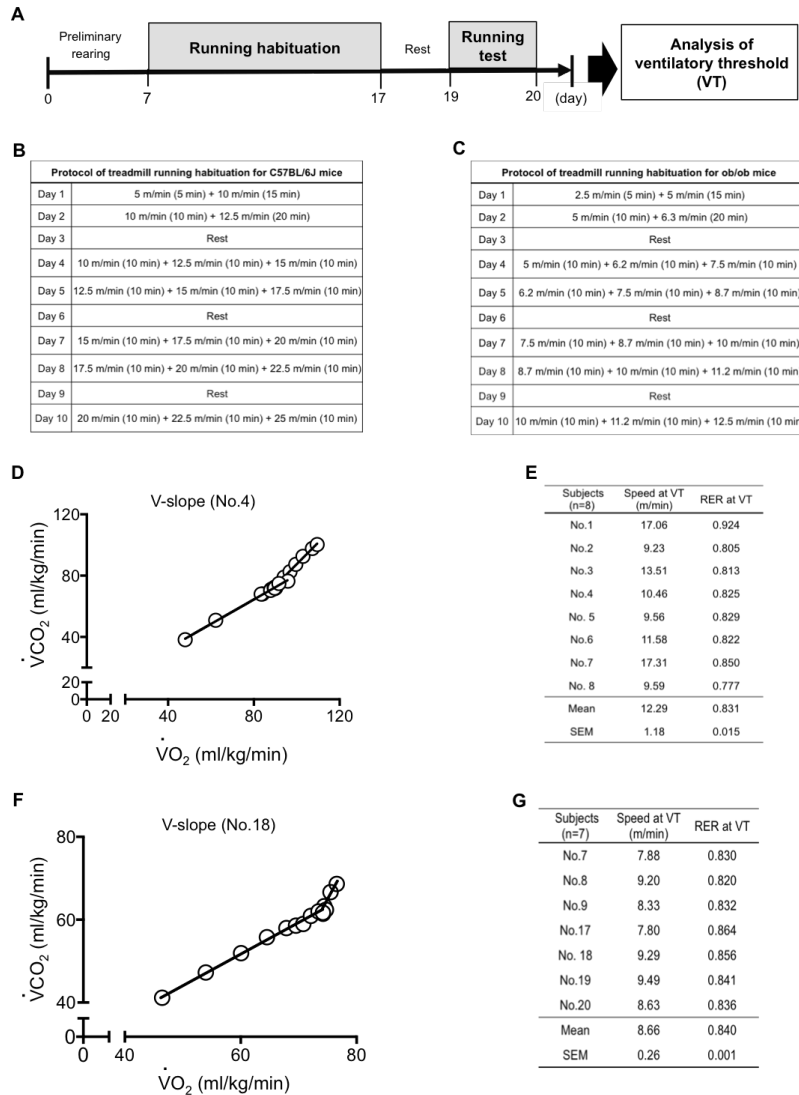

**Fig. S6. The measurement of ventilatory threshold in C57BL/6J and *ob/ob* mice.** (A) For a running test, C57BL/6J (WT) and *ob/ob* mice initially had an exercise habituation for 10 days, followed by a rest period for 2 days. (B and C) To measure the level of ventilatory threshold (VT), the mice had a running habituation including a total of 7 bouts of training under graded speed, from 5 to 25 m/min for WT mice and from 2.5 to 12.5 m/min for *ob/ob* mice, on an isolated treadmill containing chamber system (Metabolic Modular Treadmill; Columbus Instruments, Columbus, OH, USA). During the test, the gas flow such as oxygen consumption ( $\dot{V}O_2$ ) and carbon dioxide expiration ( $\dot{V}CO_2$ ) every 60 sec was collected (Oxymax Software, Columbus Instruments). (D and F) The VT is a point at which the slope of the relative rate of increase in  $\dot{V}CO_2$  relative to  $\dot{V}O_2$  changes by the V-slope method. A representative VT profile for a WT mouse (No. 4) and *ob/ob* mouse (No. 18) is indicated. (E) The mean of treadmill speed and RER at VT from eight WT mice was found to be 12.29 m/min and 0.831, respectively. (G) The mean of treadmill speed and RER at VT from seven *ob/ob* mice was found to be 8.66 m/min and 0.840, respectively.



**Table S1.** Morris Water Maze (MWM) results for different intervention.

| Group                       | Day 1            | Day 2                            | Day 3                            | Day 4                            |
|-----------------------------|------------------|----------------------------------|----------------------------------|----------------------------------|
| <b>WT mice</b>              |                  |                                  |                                  |                                  |
| <b>Escape latency (sec)</b> |                  |                                  |                                  |                                  |
| SE+PL                       | 58.62 ± 1.12     | 42.58 ± 3.08 <sup>††</sup>       | 34.55 ± 3.18 <sup>††††</sup>     | 28.99 ± 2.89 <sup>††††</sup>     |
| ME+PL                       | 52.41 ± 2.84     | 31.57 ± 4.41 <sup>††††</sup>     | 20.14 ± 1.02 <sup>††††</sup>     | 19.25 ± 2.79 <sup>††††</sup>     |
| SE+AX                       | 51.48 ± 3.59     | 39.13 ± 5.10 <sup>†</sup>        | 25.62 ± 2.81 <sup>††††</sup>     | 14.52 ± 2.27 <sup>††††</sup>     |
| ME+AX                       | 57.00 ± 1.77     | 38.50 ± 6.09 <sup>††††</sup>     | 19.19 ± 3.61 <sup>††††</sup>     | 17.95 ± 2.54 <sup>††††</sup>     |
| <b>Escape length (cm)</b>   |                  |                                  |                                  |                                  |
| SE+PL                       | 2579.79 ± 94.34  | 2103.72 ± 149.21                 | 1598.90 ± 149.85 <sup>††††</sup> | 1371.02 ± 133.15 <sup>††††</sup> |
| ME+PL                       | 2564.58 ± 111.63 | 1721.29 ± 219.70 <sup>††††</sup> | 1133.36 ± 74.04 <sup>††††</sup>  | 1037.73 ± 167.93 <sup>††††</sup> |
| SE+AX                       | 2367.30 ± 175.59 | 1889.75 ± 171.53                 | 1330.58 ± 111.52 <sup>††††</sup> | 944.12 ± 127.77 <sup>††††</sup>  |
| ME+AX                       | 2524.84 ± 75.57  | 1853.07 ± 253.42 <sup>††</sup>   | 934.87 ± 185.38 <sup>††††</sup>  | 976.12 ± 156.17 <sup>††††</sup>  |

Repeated two-way ANOVA (group × day) showed a main effect of day on escape latency and escape length ( $F_{(3, 99)} = 109.55$ ,  $P < 0.0001$  for latency;  $F_{(3, 99)} = 75.95$ ,  $P < 0.0001$  for length). <sup>†</sup> $P < 0.05$ , <sup>††</sup> $P < 0.01$ , <sup>††††</sup> $P < 0.0001$  compared to day 1. Values are expressed as mean ± SEM.

**Table S2.** Up-regulated genes in the hippocampus by the ME alone.

| Probe name    | Molecules   | ME-upregulated genes                                                              | Fold change |
|---------------|-------------|-----------------------------------------------------------------------------------|-------------|
|               | Gene symbol | Description                                                                       |             |
| A_51_P104939  | Klra4       | killer cell lectin-like receptor, subfamily A, member 4                           | 37.17       |
| A_55_P2157799 | MYO7B       | myosin VIIB                                                                       | 19.51       |
| A_55_P2007447 | ABHD3       | abhydrolase domain containing 3                                                   | 6.76        |
| A_51_P519301  | IL17F       | interleukin 17F                                                                   | 5.33        |
| A_55_P2041086 | TYW5        | tRNA-yw synthesizing protein 5                                                    | 5.18        |
| A_51_P1978860 | TP53BP2     | tumor protein p53 binding protein 2                                               | 4.77        |
| A_55_P1979536 | HRAS        | Harvey rat sarcoma viral oncogene homolog                                         | 4.36        |
| A_52_P374882  | LEP         | leptin                                                                            | 4.18        |
| A_51_P104718  | GPR12       | G protein-coupled receptor 12                                                     | 4.18        |
| A_55_P2116621 | CITED2      | Cbp/p300-interacting transactivator, with Glu/Asp-rich carboxy-terminal domain, 2 | 4.08        |
| A_51_P448478  | SLC10A4     | solute carrier family 10, member 4                                                | 4.81        |
| A_52_P337246  | ISL1        | ISL LIM homeobox 1                                                                | 3.99        |
| A_55_P2005838 | TICRR       | TOPBP1-interacting checkpoint and replication regulator                           | 3.97        |
| A_52_P548680  | PIK3C2A     | phosphatidylinositol-4-phosphate 3-kinase, catalytic subunit type 2 alpha         | 3.79        |
| A_55_P2115141 | LCOR        | ligand dependent nuclear receptor corepressor                                     | 3.77        |
| A_55_P2029289 | SMAD1       | SMAD family member 1                                                              | 3.76        |
| A_52_P498086  | SPI1        | Spi-1 proto-oncogene                                                              | 3.75        |
| A_66_P120736  | BNIP3       | BCL2/adenovirus E1B 19kDa interacting protein 3                                   | 3.63        |
| A_51_P345649  | PDGFRA      | platelet-derived growth factor receptor, alpha polypeptide                        | 3.62        |
| A_55_P2041784 | GNA13       | guanine nucleotide binding protein (G protein), alpha 13                          | 3.56        |
| A_55_P2128492 | RAP1A       | RAP1A, member of RAS oncogene family                                              | 3.50        |
| A_55_P2026889 | MED10       | mediator complex subunit 10                                                       | 3.47        |
| A_52_P532033  | HLTF        | helicase-like transcription factor                                                | 3.42        |
| A_52_P284821  | SLCO4C1     | solute carrier organic anion transporter family, member 4C1                       | 3.38        |
| A_51_P116007  | HDAC2       | histone deacetylase 2                                                             | 3.34        |
| A_52_P506493  | DCX         | doublecortin                                                                      | 3.28        |
| A_52_P474636  | STK4        | serine/threonine kinase 4                                                         | 3.26        |
| A_52_P343690  | KPNA4       | karyopherin alpha 4 (importin alpha 3)                                            | 3.19        |
| A_52_P535052  | RCOR1       | REST corepressor 1                                                                | 3.09        |
| A_66_P121459  | CENPA       | centromere protein A                                                              | 3.07        |
| A_52_P336825  | MATR3       | matrin 3                                                                          | 3.06        |
| A_52_P227445  | PARP2       | poly (ADP-ribose) polymerase 2                                                    | 3.04        |
| A_51_P230934  | CAB39       | calcium binding protein 39                                                        | 3.03        |

|               |          |                                                                                       |      |
|---------------|----------|---------------------------------------------------------------------------------------|------|
| A_51_P275101  | CHST11   | carbohydrate (chondroitin 4) sulfotransferase 11                                      | 3.01 |
| A_55_P2071447 | IL21R    | interleukin 21 receptor                                                               | 2.99 |
| A_55_P2023114 | HSD3B1   | hydroxy-delta-5-steroid dehydrogenase, 3 beta- and steroid delta-isomerase 1          | 2.97 |
| A_66_P106716  | AKAP8    | A kinase (PRKA) anchor protein 8                                                      | 2.97 |
| A_52_P329398  | ATP12A   | ATPase, H <sup>+</sup> /K <sup>+</sup> transporting, nongastric, alpha polypeptide    | 2.95 |
| A_52_P228236  | TFRC     | transferrin receptor                                                                  | 2.92 |
| A_55_P2058923 | WBSR22   | Williams Beuren syndrome chromosome region 22                                         | 2.90 |
| A_55_P2079761 | GGPS1    | geranylgeranyl diphosphate synthase 1                                                 | 2.90 |
| A_55_P2055107 | AGPAT1   | 1-acylglycerol-3-phosphate O-acyltransferase 1                                        | 2.88 |
| A_51_P468126  | TRIM39   | tripartite motif containing 39                                                        | 2.86 |
| A_52_P406482  | MBTPS1   | membrane-bound transcription factor peptidase, site 1                                 | 2.84 |
| A_55_P1994907 | SEN2     | SUMO1/sentrin/SMT3 specific peptidase 2                                               | 2.84 |
| A_55_P1961736 | RCAN2    | regulator of calcineurin 2                                                            | 2.81 |
| A_51_P158922  | PRKAA1   | protein kinase, AMP-activated, alpha 1 catalytic subunit                              | 2.81 |
| A_52_P49014   | SHH      | sonic hedgehog                                                                        | 2.78 |
| A_52_P549827  | MGST1    | microsomal glutathione S-transferase 1                                                | 2.78 |
| A_55_P2408588 | ARNTL    | aryl hydrocarbon receptor nuclear translocator-like                                   | 2.78 |
| A_65_P10351   | ATP2B1   | ATPase, Ca <sup>++</sup> transporting, plasma membrane 1                              | 2.78 |
| A_51_P430766  | IL10     | interleukin 10                                                                        | 2.76 |
| A_51_P470328  | SEPP1    | selenoprotein P, plasma, 1                                                            | 2.75 |
| A_51_P480320  | USP24    | ubiquitin specific peptidase 24                                                       | 2.74 |
| A_51_P124535  | MEST     | mesoderm specific transcript                                                          | 2.74 |
| A_55_P2057040 | PPP1R16B | protein phosphatase 1, regulatory subunit 16B                                         | 2.73 |
| A_66_P129769  | SIK2     | salt-inducible kinase 2                                                               | 2.73 |
| A_51_P374900  | P2RY13   | purinergic receptor P2Y, G-protein coupled, 13                                        | 2.71 |
| A_52_P307739  | SOX2     | SRY (sex determining region Y)-box 2                                                  | 2.71 |
| A_55_P2186205 | TRAPPC2  | trafficking protein particle complex 2                                                | 2.68 |
| A_51_P121302  | THEM4    | thioesterase superfamily member 4                                                     | 2.68 |
| A_55_P2151646 | MCM9     | minichromosome maintenance complex component 9                                        | 2.68 |
| A_52_P585124  | CXCR4    | chemokine (C-X-C motif) receptor 4                                                    | 2.67 |
| A_51_P511015  | FZD9     | frizzled class receptor 9                                                             | 2.65 |
| A_66_P116154  | CSTF2    | cleavage stimulation factor, 3' pre-RNA, subunit 2, 64kDa                             | 2.64 |
| A_51_P433026  | PPAPDC2  | phosphatidic acid phosphatase type 2 domain containing 2                              | 2.64 |
| A_51_P254855  | PTGS2    | prostaglandin-endoperoxide synthase 2 (prostaglandin G/H synthase and cyclooxygenase) | 2.61 |
| A_51_P513392  | AZI2     | 5-azacytidine induced 2                                                               | 2.60 |

|                |                         |                                                                                    |      |
|----------------|-------------------------|------------------------------------------------------------------------------------|------|
| A_55_P12124582 | Xlr4a (includes others) | X-linked lymphocyte-regulated 4A                                                   | 2.60 |
| A_55_P2034864  | TUBB2B                  | tubulin, beta 2B class IIb                                                         | 2.59 |
| A_55_P2094955  | GRM1                    | glutamate receptor, metabotropic 1                                                 | 2.55 |
| A_51_P234881   | ELOVL4                  | ELOVL fatty acid elongase 4                                                        | 2.54 |
| A_51_P475501   | NDUFA8                  | NADH dehydrogenase (ubiquinone) 1 alpha subcomplex, 8, 19kDa                       | 2.54 |
| A_55_P2038212  | ATP13A4                 | ATPase type 13A4                                                                   | 2.54 |
| A_52_P350750   | CHRNA4                  | cholinergic receptor, nicotinic, alpha 4 (neuronal)                                | 2.53 |
| A_66_P108791   | CAMK4                   | calcium/calmodulin-dependent protein kinase IV                                     | 2.52 |
| A_51_P227392   | RHOU                    | ras homolog family member U                                                        | 2.51 |
| A_51_P268697   | SLC1A3                  | solute carrier family 1 (glial high affinity glutamate transporter), member 3      | 2.48 |
| A_51_P501550   | UXS1                    | UDP-glucuronate decarboxylase 1                                                    | 2.47 |
| A_51_P488092   | PDE6D                   | phosphodiesterase 6D, cGMP-specific, rod, delta                                    | 2.47 |
| A_52_P214630   | SOX9                    | SRY (sex determining region Y)-box 9                                               | 2.44 |
| A_66_P139167   | SAFB                    | scaffold attachment factor B                                                       | 2.42 |
| A_55_P1960901  | TGFBR1                  | transforming growth factor, beta receptor 1                                        | 2.42 |
| A_52_P596008   | ZEB2                    | zinc finger E-box binding homeobox 2                                               | 2.42 |
| A_55_P1961436  | PRKCA                   | protein kinase C, alpha                                                            | 2.40 |
| A_52_P317393   | ADGRG1                  | adhesion G protein-coupled receptor 1                                              | 2.26 |
| A_66_P120555   | GRIK3                   | glutamate receptor, ionotropic, kainate 3                                          | 2.25 |
| A_55_P2121466  | NCOR1                   | nuclear receptor corepressor 1                                                     | 2.25 |
| A_51_P371279   | ICOS                    | inducible T-cell co-stimulator                                                     | 2.23 |
| A_51_P258768   | PAQR5                   | progesterin and adipoQ receptor family member V                                    | 2.23 |
| A_51_P484289   | SLC7A6                  | solute carrier family 7 (amino acid transporter light chain, y+L system), member 6 | 2.23 |
| A_55_P2086692  | NFIB                    | nuclear factor I/B                                                                 | 2.23 |
| A_51_P261107   | OGT                     | O-linked N-acetylglucosamine (GlcNAc) transferase                                  | 2.23 |
| A_52_P38011    | RALYL                   | RALY RNA binding protein-like                                                      | 2.22 |
| A_52_P552665   | FZD7                    | frizzled class receptor 7                                                          | 2.22 |
| A_55_P2160682  | SET                     | SET nuclear proto-oncogene                                                         | 2.22 |
| A_51_P289392   | Naip1 (includes others) | NLR family, apoptosis inhibitory protein 1                                         | 2.21 |
| A_66_P118592   | ATRX                    | alpha thalassemia/mental retardation syndrome X-linked                             | 2.20 |
| A_55_P1981040  | DDX6                    | DEAD (Asp-Glu-Ala-Asp) box helicase 6                                              | 2.19 |
| A_55_P2015238  | DCTN4                   | dynactin 4 (p62)                                                                   | 2.19 |
| A_55_P2058340  | PRDX4                   | peroxiredoxin 4                                                                    | 2.18 |
| A_66_P134405   | AXIN2                   | axin 2                                                                             | 2.18 |
| A_51_P261164   | F2RL2                   | coagulation factor II (thrombin) receptor-like 2                                   | 2.18 |
| A_55_P2015113  | ATG5                    | autophagy related 5                                                                | 2.18 |
| A_51_P349878   | TXNDC17                 | thioredoxin domain containing 17                                                   | 2.17 |

|               |         |                                                                                      |      |
|---------------|---------|--------------------------------------------------------------------------------------|------|
| A_55_P2164070 | GRIP1   | glutamate receptor interacting protein 1                                             | 2.17 |
| A_55_P1968778 | RASA1   | RAS p21 protein activator (GTPase activating protein) 1                              | 2.17 |
| A_55_P2089645 | TUB     | tubby bipartite transcription factor                                                 | 2.16 |
| A_52_P369581  | ATM     | ATM serine/threonine kinase                                                          | 2.15 |
| A_55_P1960601 | SLC4A10 | solute carrier family 4, sodium bicarbonate transporter, member 10                   | 2.15 |
| A_51_P374772  | ARFGEF1 | ADP-ribosylation factor guanine nucleotide-exchange factor 1 (brefeldin A-inhibited) | 2.14 |
| A_52_P658122  | ETS2    | v-ets avian erythroblastosis virus E26 oncogene homolog 2                            | 2.13 |
| A_51_P220896  | CHMP2B  | charged multivesicular body protein 2B                                               | 2.13 |
| A_51_P100787  | SNW1    | SNW domain containing 1                                                              | 2.12 |
| A_51_P104891  | EPT1    | ethanolaminephosphotransferase 1 (CDP-ethanolamine-specific)                         | 2.12 |
| A_55_P2024580 | DTNBP1  | dystrobrevin binding protein 1                                                       | 2.11 |
| A_51_P285916  | RAPGEF4 | Rap guanine nucleotide exchange factor (GEF) 4                                       | 2.10 |
| A_55_P2119897 | ERBB3   | v-erb-b2 avian erythroblastic leukemia viral oncogene homolog 3                      | 2.10 |
| A_65_P09090   | ARIH2   | ariadne RBR E3 ubiquitin protein ligase 2                                            | 2.10 |
| A_51_P464588  | DNAJC28 | DnaJ (Hsp40) homolog, subfamily C, member 28                                         | 2.09 |
| A_55_P2167249 | CCDC112 | coiled-coil domain containing 112                                                    | 2.08 |
| A_51_P155763  | ASCC3   | activating signal cointegrator 1 complex subunit 3                                   | 2.08 |
| A_52_P258546  | NLGN1   | neuroligin 1                                                                         | 2.07 |
| A_55_P2039771 | ITGAV   | integrin, alpha V                                                                    | 2.07 |
| A_51_P487360  | HPCAL1  | hippocalcin-like 1                                                                   | 2.07 |
| A_51_P142923  | CHKA    | choline kinase alpha                                                                 | 2.07 |
| A_55_P1968129 | TCEB1   | transcription elongation factor B (SIII), polypeptide 1 (15kDa, elongin C)           | 2.07 |
| A_55_P2164724 | GNAQ    | guanine nucleotide binding protein (G protein), q polypeptide                        | 2.07 |
| A_55_P2167769 | ARID1A  | AT rich interactive domain 1A (SWI-like)                                             | 2.07 |
| A_52_P565051  | CPNE3   | copine III                                                                           | 2.07 |
| A_55_P2021149 | CLTB    | clathrin, light chain B                                                              | 2.06 |
| A_55_P2062274 | RAD23B  | RAD23 homolog B (S. cerevisiae)                                                      | 2.06 |
| A_55_P1952056 | TP63    | tumor protein p63                                                                    | 2.06 |
| A_51_P383991  | 04-Sep  | septin 4                                                                             | 2.05 |
| A_52_P206881  | PRPF18  | pre-mRNA processing factor 18                                                        | 2.05 |
| A_51_P232281  | PLA2G2D | phospholipase A2, group IID                                                          | 2.04 |
| A_55_P2106922 | ARFGAP3 | ADP-ribosylation factor GTPase activating protein 3                                  | 2.03 |
| A_55_P1972923 | POLR1D  | polymerase (RNA) I polypeptide D, 16kDa                                              | 2.03 |
| A_55_P2154835 | AP1G1   | adaptor-related protein complex 1, gamma 1 subunit                                   | 2.02 |
| A_55_P1960994 | NLGN3   | neuroligin 3                                                                         | 2.02 |

|               |                      |                                                                               |      |
|---------------|----------------------|-------------------------------------------------------------------------------|------|
| A_51_P100997  | Serpinb3b/Serpin b3c | serine (or cysteine) peptidase inhibitor, clade B (ovalbumin), member 3B      | 2.02 |
| A_55_P2125774 | OLA1                 | Obg-like ATPase 1                                                             | 2.01 |
| A_51_P144249  | UBR1                 | ubiquitin protein ligase E3 component n-recognin 1                            | 2.01 |
| A_55_P2070936 | TRA2B                | transformer 2 beta homolog (Drosophila)                                       | 2.01 |
| A_52_P39157   | COMMD3-BMI1          | COMMD3-BMI1 readthrough                                                       | 2.00 |
| A_66_P117838  | DHX29                | DEAH (Asp-Glu-Ala-His) box polypeptide 29                                     | 2.00 |
| A_52_P327402  | CDS1                 | CDP-diacylglycerol synthase (phosphatidate cytidyltransferase) 1              | 2.00 |
| A_66_P109220  | METTL20              | methyltransferase like 20                                                     | 1.99 |
| A_55_P1980543 | UBE2I                | ubiquitin-conjugating enzyme E2I                                              | 1.99 |
| A_55_P2030186 | IFNA4                | interferon, alpha 4                                                           | 1.99 |
| A_52_P200617  | IARS                 | isoleucyl-tRNA synthetase                                                     | 1.98 |
| A_66_P113760  | ACVR2A               | activin A receptor, type IIA                                                  | 1.98 |
| A_55_P2130535 | DNMT3B               | DNA (cytosine-5-)-methyltransferase 3 beta                                    | 1.97 |
| A_52_P338110  | CHMP1B               | charged multivesicular body protein 1B                                        | 1.97 |
| A_55_P2027117 | RGS3                 | regulator of G-protein signaling 3                                            | 1.97 |
| A_65_P08507   | ADAM23               | ADAM metallopeptidase domain 23                                               | 1.96 |
| A_55_P2042071 | SLC25A3              | solute carrier family 25 (mitochondrial carrier; phosphate carrier), member 3 | 1.96 |
| A_55_P2451183 | PDPK1                | 3-phosphoinositide dependent protein kinase 1                                 | 1.96 |
| A_55_P1975420 | DHX40                | DEAH (Asp-Glu-Ala-His) box polypeptide 40                                     | 1.95 |
| A_55_P2038947 | LIG3                 | ligase III, DNA, ATP-dependent                                                | 1.95 |
| A_55_P2108171 | GLUD1                | glutamate dehydrogenase 1                                                     | 1.94 |
| A_55_P2105371 | DLK1                 | delta-like 1 homolog (Drosophila)                                             | 1.93 |
| A_51_P431772  | NDUFA3               | NADH dehydrogenase (ubiquinone) 1 alpha subcomplex, 3, 9kDa                   | 1.92 |
| A_55_P2080225 | PLAA                 | phospholipase A2-activating protein                                           | 1.91 |
| A_52_P453785  | CTHRC1               | collagen triple helix repeat containing 1                                     | 1.91 |
| A_55_P2235931 | CACNA1C              | calcium channel, voltage-dependent, L type, alpha 1C subunit                  | 2.29 |
| A_51_P221031  | SLC16A12             | solute carrier family 16, member 12                                           | 2.14 |
| A_55_P1994462 | AVPR2                | arginine vasopressin receptor 2                                               | 1.88 |
| A_51_P295410  | NAP1L5               | nucleosome assembly protein 1-like 5                                          | 1.87 |
| A_51_P121818  | PRKAG1               | protein kinase, AMP-activated, gamma 1 non-catalytic subunit                  | 1.87 |
| A_55_P2176802 | HIPK1                | homeodomain interacting protein kinase 1                                      | 1.87 |
| A_55_P1969481 | HIVEP3               | human immunodeficiency virus type I enhancer binding protein 3                | 1.86 |
| A_52_P867058  | KCNC1                | potassium voltage-gated channel, Shaw-related subfamily, member 1             | 1.86 |
| A_52_P140394  | MTMR1                | myotubularin related protein 1                                                | 1.85 |
| A_51_P452820  | RPL31                | ribosomal protein L31                                                         | 1.85 |
| A_55_P2051254 | PVT1                 | Pvt1 oncogene (non-protein coding)                                            | 1.85 |
| A_66_P129564  | NGB                  | neuroglobin                                                                   | 1.85 |

|               |         |                                                                                   |      |
|---------------|---------|-----------------------------------------------------------------------------------|------|
| A_55_P2107715 | COL25A1 | collagen, type XXV, alpha 1                                                       | 1.84 |
| A_51_P108581  | ADRBK2  | adrenergic, beta, receptor kinase 2                                               | 1.84 |
| A_55_P2158921 | HTR2C   | 5-hydroxytryptamine (serotonin) receptor 2C, G protein-coupled                    | 1.84 |
| A_52_P30920   | SRR     | serine racemase                                                                   | 1.84 |
| A_51_P307243  | PPP5C   | protein phosphatase 5, catalytic subunit                                          | 1.84 |
| A_55_P2040026 | ITGA4   | integrin, alpha 4 (antigen CD49D, alpha 4 subunit of VLA-4 receptor)              | 1.84 |
| A_51_P119039  | NPY5R   | neuropeptide Y receptor Y5                                                        | 1.84 |
| A_55_P1993708 | LRP12   | low density lipoprotein receptor-related protein 12                               | 1.83 |
| A_51_P131561  | PLET1   | placenta expressed transcript 1                                                   | 1.83 |
| A_51_P432937  | NPAS3   | neuronal PAS domain protein 3                                                     | 1.83 |
| A_55_P2089942 | XPO1    | exportin 1                                                                        | 1.83 |
| A_51_P397375  | GATB    | glutamyl-tRNA(Gln) amidotransferase, subunit B                                    | 1.82 |
| A_52_P68221   | GRIA3   | glutamate receptor, ionotropic, AMPA 3                                            | 1.81 |
| A_52_P38627   | EGF     | epidermal growth factor                                                           | 1.81 |
| A_55_P1982245 | PHACTR2 | phosphatase and actin regulator 2                                                 | 1.81 |
| A_51_P122141  | MAMSTR  | MEF2 activating motif and SAP domain containing transcriptional regulator         | 1.81 |
| A_52_P265002  | PIK3CA  | phosphatidylinositol-4,5-bisphosphate 3-kinase, catalytic subunit alpha           | 1.80 |
| A_55_P1954196 | C1QL3   | complement component 1, q subcomponent-like 3                                     | 1.80 |
| A_52_P524895  | EIF3A   | eukaryotic translation initiation factor 3, subunit A                             | 1.80 |
| A_55_P2090330 | KCNMB4  | potassium large conductance calcium-activated channel, subfamily M, beta member 4 | 1.80 |
| A_55_P2065389 | CAMSAP1 | calmodulin regulated spectrin-associated protein 1                                | 1.79 |
| A_51_P323842  | FAM96B  | family with sequence similarity 96, member B                                      | 1.77 |
| A_55_P2009622 | S100PBP | S100P binding protein                                                             | 1.77 |
| A_51_P100309  | OPRM1   | opioid receptor, mu 1                                                             | 1.77 |
| A_52_P311104  | BRD7    | bromodomain containing 7                                                          | 1.77 |
| A_55_P2058240 | IPO5    | importin 5                                                                        | 1.75 |
| A_52_P238468  | GIPR    | gastric inhibitory polypeptide receptor                                           | 1.75 |
| A_51_P444052  | SCP2    | sterol carrier protein 2                                                          | 1.74 |
| A_51_P293989  | SENP6   | SUMO1/sentrin specific peptidase 6                                                | 1.74 |
| A_51_P109840  | VTN     | vitronectin                                                                       | 1.73 |
| A_52_P623226  | FUT2    | fucosyltransferase 2 (secretor status included)                                   | 1.73 |
| A_55_P2005135 | TARDBP  | TAR DNA binding protein                                                           | 1.73 |
| A_55_P2078247 | PPP1R10 | protein phosphatase 1, regulatory subunit 10                                      | 1.72 |
| A_51_P367162  | PSMB1   | proteasome (prosome, macropain) subunit, beta type, 1                             | 1.72 |
| A_55_P2013793 | ZNF654  | zinc finger protein 654                                                           | 1.72 |
| A_52_P452787  | PDCD6IP | programmed cell death 6 interacting protein                                       | 1.72 |

|               |          |                                                                                         |      |
|---------------|----------|-----------------------------------------------------------------------------------------|------|
| A_55_P1999691 | USP27X   | ubiquitin specific peptidase 27, X-linked                                               | 1.71 |
| A_52_P579640  | RRS1     | RRS1 ribosome biogenesis regulator homolog (S. cerevisiae)                              | 1.70 |
| A_51_P438527  | CTB5R1   | cytochrome b5 reductase 1                                                               | 1.70 |
| A_55_P2015687 | PHF11    | PHD finger protein 11                                                                   | 1.70 |
| A_52_P144310  | GAD1     | glutamate decarboxylase 1 (brain, 67kDa)                                                | 1.70 |
| A_55_P2011286 | HOPX     | HOP homeobox                                                                            | 1.69 |
| A_55_P2141306 | SYNJ2BP  | synaptojanin 2 binding protein                                                          | 1.69 |
| A_51_P320614  | TXNRD1   | thioredoxin reductase 1                                                                 | 1.69 |
| A_51_P106144  | ZFP64    | ZFP64 zinc finger protein                                                               | 1.69 |
| A_55_P2078960 | Tdh      | L-threonine dehydrogenase                                                               | 1.68 |
| A_55_P2006118 | RBP4     | retinol binding protein 4, plasma                                                       | 1.67 |
| A_51_P128336  | SERINC5  | serine incorporator 5                                                                   | 1.67 |
| A_55_P1988033 | ATP6V1G1 | ATPase, H+ transporting, lysosomal 13kDa, V1 subunit G1                                 | 1.67 |
| A_55_P2113256 | PARP11   | poly (ADP-ribose) polymerase family, member 11                                          | 1.67 |
| A_55_P2033120 | SRXN1    | sulfiredoxin 1                                                                          | 1.66 |
| A_51_P114005  | GSTM2    | glutathione S-transferase mu 2 (muscle)                                                 | 1.65 |
| A_55_P1972981 | PHACTR3  | phosphatase and actin regulator 3                                                       | 1.64 |
| A_55_P2029366 | ABHD6    | abhydrolase domain containing 6                                                         | 1.64 |
| A_52_P657435  | C16orf91 | chromosome 16 open reading frame 91                                                     | 2.88 |
| A_55_P2087671 | ABHD12   | abhydrolase domain containing 12                                                        | 1.63 |
| A_52_P376214  | CSTF3    | cleavage stimulation factor, 3' pre-RNA, subunit 3, 77kDa                               | 1.62 |
| A_55_P2078463 | NRL      | neural retina leucine zipper                                                            | 1.62 |
| A_55_P1999829 | THOC7    | THO complex 7 homolog (Drosophila)                                                      | 1.62 |
| A_55_P2090943 | LARP4    | La ribonucleoprotein domain family, member 4                                            | 1.61 |
| A_51_P481788  | MAPK1    | mitogen-activated protein kinase 1                                                      | 1.61 |
| A_55_P2003115 | RNF7     | ring finger protein 7                                                                   | 1.61 |
| A_55_P2140711 | TUFM     | Tu translation elongation factor, mitochondrial                                         | 1.60 |
| A_51_P196127  | PAPSS1   | 3'-phosphoadenosine 5'-phosphosulfate synthase 1                                        | 1.60 |
| A_66_P126836  | ZBTB44   | zinc finger and BTB domain containing 44                                                | 1.59 |
| A_51_P487501  | MOB1A    | MOB kinase activator 1A                                                                 | 1.59 |
| A_55_P2137887 | MPDZ     | multiple PDZ domain protein                                                             | 1.59 |
| A_55_P2076489 | RAC1     | ras-related C3 botulinum toxin substrate 1 (rho family, small GTP binding protein Rac1) | 1.58 |
| A_51_P415126  | TGFA     | transforming growth factor, alpha                                                       | 1.58 |
| A_55_P2133280 | AP4B1    | adaptor-related protein complex 4, beta 1 subunit                                       | 1.58 |
| A_55_P2044045 | YBX1     | Y box binding protein 1                                                                 | 1.57 |
| A_51_P296448  | CASP2    | caspase 2, apoptosis-related cysteine peptidase                                         | 1.57 |
| A_51_P107362  | SOCS2    | suppressor of cytokine signaling 2                                                      | 1.57 |



|               |       |                                                                                  |      |
|---------------|-------|----------------------------------------------------------------------------------|------|
| A_52_P135469  | NDST1 | N-deacetylase/N-sulfotransferase (heparan glucosaminy) 1                         | 1.57 |
| A_55_P2350022 | AKAP6 | A kinase (PRKA) anchor protein 6                                                 | 1.56 |
| A_55_P1991219 | STAT3 | signal transducer and activator of transcription 3 (acute-phase response factor) | 1.56 |
| A_55_P2076159 | WRB   | tryptophan rich basic protein                                                    | 1.54 |
| A_55_P2054082 | CHST9 | carbohydrate (N-acetylgalactosamine 4-0) sulfotransferase 9                      | 1.53 |
| A_55_P2074326 | NEU4  | sialidase 4                                                                      | 1.52 |
| A_55_P2148844 | BEND4 | BEN domain containing 4                                                          | 1.51 |

**Table S3.** Down-regulated genes in the hippocampus by the ME alone.

| Probe name    | Molecules   | ME-induced downregulation                                                       | Fold Change |
|---------------|-------------|---------------------------------------------------------------------------------|-------------|
|               | Gene Symbol | Description                                                                     |             |
| A_55_P1966239 | Podxl       | podocalyxin-like                                                                | -4.17       |
| A_52_P15388   | LTF         | lactotransferrin                                                                | -3.23       |
| A_55_P2063107 | INADL       | InaD-like (Drosophila)                                                          | -3.13       |
| A_52_P334562  | VDR         | vitamin D (1,25- dihydroxyvitamin D3) receptor                                  | -3.03       |
| A_55_P2071349 | TRH         | thyrotropin-releasing hormone                                                   | -2.70       |
| A_51_P385099  | TNF         | tumor necrosis factor                                                           | -2.70       |
| A_51_P104687  | CSHL1       | chorionic somatomammotropin hormone-like 1                                      | -2.63       |
| A_55_P2115044 | NEURL3      | neuralized E3 ubiquitin protein ligase 3                                        | -2.50       |
| A_51_P186574  | THEG        | theg spermatid protein                                                          | -2.08       |
| A_55_P2000379 | PDE10A      | phosphodiesterase 10A                                                           | -1.85       |
| A_55_P2143923 | SLC13A2     | solute carrier family 13 (sodium-dependent dicarboxylate transporter), member 2 | -1.82       |
| A_51_P212308  | CXADR       | coxsackie virus and adenovirus receptor                                         | -1.82       |
| A_55_P2068306 | POLR1B      | polymerase (RNA) I polypeptide B, 128kDa                                        | -1.79       |
| A_55_P2184434 | EOMES       | eomesodermin                                                                    | -1.75       |
| A_55_P2201345 | HOXC8       | homeobox C8                                                                     | -1.70       |
| A_55_P2266178 | IL2RB       | interleukin 2 receptor, beta                                                    | -1.67       |
| A_66_P116635  | IGF2-AS     | IGF2 antisense RNA                                                              | -1.61       |
| A_51_P150302  | CRTAM       | cytotoxic and regulatory T cell molecule                                        | -1.61       |
| A_51_P484880  | BCL2L11     | BCL2-like 11 (apoptosis facilitator)                                            | -1.61       |
| A_55_P2005655 | NTSR1       | neurotensin receptor 1 (high affinity)                                          | -1.56       |
| A_51_P155565  | C3orf20     | chromosome 3 open reading frame 20                                              | -1.54       |
| A_55_P2148204 | PTGDR       | prostaglandin D2 receptor (DP)                                                  | -1.52       |
| A_55_P2080870 | CMTM7       | CKLF-like MARVEL transmembrane domain containing 7                              | -1.50       |
| A_55_P2124736 | COL14A1     | collagen, type XIV, alpha 1                                                     | -1.49       |
| A_51_P125205  | AQP1        | aquaporin 1 (Colton blood group)                                                | -1.47       |
| A_51_P256747  | ADCY10      | adenylate cyclase 10 (soluble)                                                  | -1.45       |
| A_55_P2005585 | TRPS1       | trichorhinophalangeal syndrome I                                                | -1.43       |
| A_55_P2069435 | ZFP82       | ZFP82 zinc finger protein                                                       | -1.41       |
| A_55_P2241299 | OTUD7B      | OTU deubiquitinase 7B                                                           | -1.41       |
| A_55_P1997696 | PLBD1       | phospholipase B domain containing 1                                             | -1.39       |
| A_52_P173580  | LRRIQ3      | leucine-rich repeats and IQ motif containing 3                                  | -1.37       |
| A_66_P108138  | IMPACT      | impact RWD domain protein                                                       | -1.37       |
| A_52_P532355  | LIN28B      | lin-28 homolog B (C. elegans)                                                   | -1.37       |
| A_51_P242967  | PIWIL2      | piwi-like RNA-mediated gene silencing 2                                         | -1.35       |

**Table S4.** Up-regulated genes in the hippocampus by the combined the ME and AX.

| Probe name    | Molecules   | ME+AX-induced upregulation                                                        | Fold Change |
|---------------|-------------|-----------------------------------------------------------------------------------|-------------|
|               | Gene Symbol | Description                                                                       |             |
| A_51_P104939  | Klra4       | killer cell lectin-like receptor, subfamily A, member 4                           | 48.44       |
| A_55_P1952091 | CA10        | carbonic anhydrase X                                                              | 20.15       |
| A_55_P2094149 | LHX6        | LIM homeobox 6                                                                    | 14.06       |
| A_51_P519301  | IL17F       | interleukin 17F                                                                   | 8.14        |
| A_55_P2007447 | ABHD3       | abhydrolase domain containing 3                                                   | 7.5         |
| A_52_P374882  | LEP         | leptin                                                                            | 6.64        |
| A_52_P498086  | SPI1        | Spi-1 proto-oncogene                                                              | 5.61        |
| A_55_P2023114 | HSD3B1      | hydroxy-delta-5-steroid dehydrogenase, 3 beta- and steroid delta-isomerase 1      | 4.85        |
| A_55_P2116621 | CITED2      | Cbp/p300-interacting transactivator, with Glu/Asp-rich carboxy-terminal domain, 2 | 4.63        |
| A_55_P2029289 | SMAD1       | SMAD family member 1                                                              | 4.57        |
| A_55_P1978860 | TP53BP2     | tumor protein p53 binding protein 2                                               | 4.5         |
| A_52_P406482  | MBTPS1      | membrane-bound transcription factor peptidase, site 1                             | 4.46        |
| A_55_P2063755 | Naip1       | NLR family, apoptosis inhibitory protein 1                                        | 4.31        |
| A_51_P371279  | ICOS        | inducible T-cell co-stimulator                                                    | 4.29        |
| A_52_P548680  | PIK3C2A     | phosphatidylinositol-4-phosphate 3-kinase, catalytic subunit type 2 alpha         | 4.05        |
| A_51_P104718  | GPR12       | G protein-coupled receptor 12                                                     | 3.93        |
| A_55_P1952985 | RPS6KA3     | ribosomal protein S6 kinase, 90kDa, polypeptide 3                                 | 3.91        |
| A_51_P345649  | PDGFRA      | platelet-derived growth factor receptor, alpha polypeptide                        | 3.7         |
| A_66_P120736  | BNIP3       | BCL2/adenovirus E1B 19kDa interacting protein 3                                   | 3.58        |
| A_52_P532033  | HLTF        | helicase-like transcription factor                                                | 3.5         |
| A_52_P350750  | CHRNA4      | cholinergic receptor, nicotinic, alpha 4 (neuronal)                               | 3.39        |
| A_55_P1976204 | CDKN1A      | cyclin-dependent kinase inhibitor 1A (p21, Cip1)                                  | 3.38        |
| A_52_P174915  | GJA1        | gap junction protein, alpha 1, 43kDa                                              | 3.37        |
| A_51_P116007  | HDAC2       | histone deacetylase 2                                                             | 3.35        |
| A_51_P261164  | F2RL2       | coagulation factor II (thrombin) receptor-like 2                                  | 3.34        |
| A_55_P2128492 | RAP1A       | RAP1A, member of RAS oncogene family                                              | 3.31        |
| A_66_P134405  | AXIN2       | axin 2                                                                            | 3.31        |
| A_51_P275101  | CHST11      | carbohydrate (chondroitin 4) sulfotransferase 11                                  | 3.3         |
| A_52_P474636  | STK4        | serine/threonine kinase 4                                                         | 3.29        |
| A_51_P468126  | TRIM39      | tripartite motif containing 39                                                    | 3.25        |
| A_52_P228236  | TFRC        | transferrin receptor                                                              | 3.18        |
| A_55_P2026889 | MED10       | mediator complex subunit 10                                                       | 3.18        |
| A_66_P121459  | CENPA       | centromere protein A                                                              | 3.15        |
| A_55_P2041784 | GNA13       | guanine nucleotide binding protein (G protein), alpha 13                          | 3.13        |
| A_52_P343690  | KPNA4       | karyopherin alpha 4 (importin alpha 3)                                            | 3.13        |

|               |          |                                                                                          |      |
|---------------|----------|------------------------------------------------------------------------------------------|------|
| A_52_P337246  | ISL1     | ISL LIM homeobox 1                                                                       | 3.11 |
| A_52_P49014   | SHH      | sonic hedgehog                                                                           | 3.08 |
| A_66_P106716  | AKAP8    | A kinase (PRKA) anchor protein 8                                                         | 3.06 |
| A_55_P2094955 | GRM1     | glutamate receptor, metabotropic 1                                                       | 3.03 |
| A_55_P2139201 | HMGCLL1  | 3-hydroxymethyl-3-methylglutaryl-CoA lyase-like 1                                        | 3.03 |
| A_52_P227445  | PARP2    | poly (ADP-ribose) polymerase 2                                                           | 3.01 |
| A_55_P1963232 | MEF2B    | myocyte enhancer factor 2B                                                               | 3    |
| A_55_P2053404 | LILRB3   | leukocyte immunoglobulin-like receptor, subfamily B (with TM and ITIM domains), member 3 | 2.97 |
| A_55_P2055107 | AGPAT1   | 1-acylglycerol-3-phosphate O-acyltransferase 1                                           | 2.97 |
| A_51_P100327  | TAP1     | transporter 1, ATP-binding cassette, sub-family B (MDR/TAP)                              | 2.94 |
| A_55_P1952056 | TP63     | tumor protein p63                                                                        | 2.94 |
| A_51_P158922  | PRKAA1   | protein kinase, AMP-activated, alpha 1 catalytic subunit                                 | 2.91 |
| A_55_P2079761 | GGPS1    | geranylgeranyl diphosphate synthase 1                                                    | 2.91 |
| A_51_P448856  | ELF4     | E74-like factor 4 (ets domain transcription factor)                                      | 2.91 |
| A_52_P585124  | CXCR4    | chemokine (C-X-C motif) receptor 4                                                       | 2.85 |
| A_55_P2408588 | ARNTL    | aryl hydrocarbon receptor nuclear translocator-like                                      | 2.84 |
| A_55_P2100770 | USP48    | ubiquitin specific peptidase 48                                                          | 2.82 |
| A_51_P374900  | P2RY13   | purinergic receptor P2Y, G-protein coupled, 13                                           | 2.82 |
| A_55_P2131672 | MICAL2   | microtubule associated monoxygenase, calponin and LIM domain containing 2                | 2.81 |
| A_52_P549827  | MGST1    | microsomal glutathione S-transferase 1                                                   | 2.8  |
| A_51_P480320  | USP24    | ubiquitin specific peptidase 24                                                          | 2.8  |
| A_55_P1994907 | SENP2    | SUMO1/sentrin/SMT3 specific peptidase 2                                                  | 2.79 |
| A_66_P116154  | CSTF2    | cleavage stimulation factor, 3' pre-RNA, subunit 2, 64kDa                                | 2.78 |
| A_55_P1961736 | RCAN2    | regulator of calcineurin 2                                                               | 2.75 |
| A_51_P403564  | LHX5     | LIM homeobox 5                                                                           | 2.74 |
| A_51_P433026  | PPAPDC2  | phosphatidic acid phosphatase type 2 domain containing 2                                 | 2.73 |
| A_65_P10351   | ATP2B1   | ATPase, Ca <sup>++</sup> transporting, plasma membrane 1                                 | 2.7  |
| A_51_P245414  | KLK3     | kallikrein-related peptidase 3                                                           | 2.68 |
| A_51_P511015  | FZD9     | frizzled class receptor 9                                                                | 2.67 |
| A_51_P513392  | AZI2     | 5-azacytidine induced 2                                                                  | 2.66 |
| A_55_P2057040 | PPP1R16B | protein phosphatase 1, regulatory subunit 16B                                            | 2.65 |
| A_52_P307739  | SOX2     | SRY (sex determining region Y)-box 2                                                     | 2.64 |
| A_51_P470328  | SEPP1    | selenoprotein P, plasma, 1                                                               | 2.63 |
| A_55_P1999888 | CHST4    | carbohydrate (N-acetylglucosamine 6-O) sulfotransferase 4                                | 2.59 |
| A_51_P234881  | ELOVL4   | ELOVL fatty acid elongase 4                                                              | 2.58 |
| A_51_P430766  | IL10     | interleukin 10                                                                           | 2.58 |
| A_51_P488092  | PDE6D    | phosphodiesterase 6D, cGMP-specific, rod, delta                                          | 2.56 |
| A_66_P108791  | CAMK4    | calcium/calmodulin-dependent protein kinase IV                                           | 2.55 |

|               |                   |                                                                                       |      |
|---------------|-------------------|---------------------------------------------------------------------------------------|------|
| A_66_P139167  | SAFB              | scaffold attachment factor B                                                          | 2.55 |
| A_51_P294095  | PRKAR1A           | protein kinase, cAMP-dependent, regulatory, type I, alpha                             | 2.54 |
| A_52_P651034  | TMX1              | thioredoxin-related transmembrane protein 1                                           | 2.53 |
| A_51_P432937  | NPAS3             | neuronal PAS domain protein 3                                                         | 2.53 |
| A_55_P2094034 | NRG2              | neuregulin 2                                                                          | 2.51 |
| A_51_P479914  | PIK3CB            | phosphatidylinositol-4,5-bisphosphate 3-kinase, catalytic subunit beta                | 2.51 |
| A_55_P2235931 | CACNA1C           | calcium channel, voltage-dependent, L type, alpha 1C subunit                          | 2.5  |
| A_66_P120555  | GRIK3             | glutamate receptor, ionotropic, kainate 3                                             | 2.5  |
| A_52_P535052  | RCOR1             | REST corepressor 1                                                                    | 2.5  |
| A_51_P268697  | SLC1A3            | solute carrier family 1 (glial high affinity glutamate transporter), member 3         | 2.48 |
| A_52_P214630  | SOX9              | SRY (sex determining region Y)-box 9                                                  | 2.48 |
| A_51_P475501  | NDUFA8            | NADH dehydrogenase (ubiquinone) 1 alpha subcomplex, 8, 19kDa                          | 2.48 |
| A_52_P327402  | CDS1              | CDP-diacylglycerol synthase (phosphatidate cytidyltransferase) 1                      | 2.48 |
| A_51_P124535  | MEST              | mesoderm specific transcript                                                          | 2.46 |
| A_52_P67440   | IRAK4             | interleukin-1 receptor-associated kinase 4                                            | 2.45 |
| A_66_P118592  | ATRX              | alpha thalassemia/mental retardation syndrome X-linked                                | 2.43 |
| A_51_P464918  | MEFV              | Mediterranean fever                                                                   | 2.42 |
| A_55_P1999691 | USP27X            | ubiquitin specific peptidase 27, X-linked                                             | 2.42 |
| A_51_P285916  | RAPGEF4           | Rap guanine nucleotide exchange factor (GEF) 4                                        | 2.42 |
| A_51_P227392  | RHOU              | ras homolog family member U                                                           | 2.42 |
| A_52_P369581  | ATM               | ATM serine/threonine kinase                                                           | 2.41 |
| A_55_P2063311 | MGLL              | monoglyceride lipase                                                                  | 2.39 |
| A_55_P1961436 | PRKCA             | protein kinase C, alpha                                                               | 2.37 |
| A_52_P317393  | ADGRG1            | adhesion G protein-coupled receptor G1                                                | 2.37 |
| A_55_P2026669 | ATP5L             | ATP synthase, H+ transporting, mitochondrial Fo complex, subunit G                    | 2.37 |
| A_51_P100997  | Serpib3b/Serpib3c | serine (or cysteine) peptidase inhibitor, clade B (ovalbumin), member 3B              | 2.37 |
| A_52_P284821  | SLCO4C1           | solute carrier organic anion transporter family, member 4C1                           | 2.36 |
| A_51_P484289  | SLC7A6            | solute carrier family 7 (amino acid transporter light chain, y+L system), member 6    | 2.35 |
| A_52_P35384   | DRD5              | dopamine receptor D5                                                                  | 2.35 |
| A_51_P254855  | PTGS2             | prostaglandin-endoperoxide synthase 2 (prostaglandin G/H synthase and cyclooxygenase) | 2.35 |
| A_66_P129769  | SIK2              | salt-inducible kinase 2                                                               | 2.31 |
| A_55_P2089645 | TUB               | tubby bipartite transcription factor                                                  | 2.3  |
| A_52_P596008  | ZEB2              | zinc finger E-box binding homeobox 2                                                  | 2.3  |
| A_55_P2160682 | SET               | SET nuclear proto-oncogene                                                            | 2.3  |
| A_52_P237232  | THPO              | thrombopoietin                                                                        | 2.3  |
| A_55_P2034864 | TUBB2B            | tubulin, beta 2B class IIb                                                            | 2.29 |

|               |          |                                                                       |      |
|---------------|----------|-----------------------------------------------------------------------|------|
| A_52_P552665  | FZD7     | frizzled class receptor 7                                             | 2.27 |
| A_55_P2121466 | NCOR1    | nuclear receptor corepressor 1                                        | 2.27 |
| A_52_P38011   | RALYL    | RALY RNA binding protein-like                                         | 2.26 |
| A_65_P08507   | ADAM23   | ADAM metalloproteinase domain 23                                      | 2.26 |
| A_52_P658122  | ETS2     | v-ets avian erythroblastosis virus E26 oncogene homolog<br>2          | 2.25 |
| A_55_P1976395 | NSDHL    | NAD(P) dependent steroid dehydrogenase-like                           | 2.24 |
| A_55_P1968778 | RASA1    | RAS p21 protein activator (GTPase activating protein) 1               | 2.23 |
| A_51_P487360  | HPCAL1   | hippocalcin-like 1                                                    | 2.23 |
| A_51_P100787  | SNW1     | SNW domain containing 1                                               | 2.22 |
| A_51_P142923  | CHKA     | choline kinase alpha                                                  | 2.22 |
| A_55_P2086692 | NFIB     | nuclear factor I/B                                                    | 2.19 |
| A_55_P1981040 | DDX6     | DEAD (Asp-Glu-Ala-Asp) box helicase 6                                 | 2.18 |
| A_55_P1999057 | CPS1     | carbamoyl-phosphate synthase 1, mitochondrial                         | 2.18 |
| A_51_P144249  | UBR1     | ubiquitin protein ligase E3 component n-recognin 1                    | 2.18 |
| A_55_P2021149 | CLTB     | clathrin, light chain B                                               | 2.17 |
| A_55_P2059904 | CHSY1    | chondroitin sulfate synthase 1                                        | 2.17 |
| A_55_P2154835 | AP1G1    | adaptor-related protein complex 1, gamma 1 subunit                    | 2.15 |
| A_55_P2015238 | DCTN4    | dynactin 4 (p62)                                                      | 2.14 |
| A_51_P131942  | DPH5     | diphthamide biosynthesis 5                                            | 2.14 |
| A_51_P104891  | EPT1     | ethanolaminephosphotransferase 1 (CDP-ethanolamine-<br>specific)      | 2.14 |
| A_55_P1972842 | KLF3     | Kruppel-like factor 3 (basic)                                         | 2.13 |
| A_55_P2164070 | GRIP1    | glutamate receptor interacting protein 1                              | 2.13 |
| A_55_P2133032 | KIRREL3  | kin of IRRE like 3 (Drosophila)                                       | 2.11 |
| A_51_P383991  | 04-Sep   | septin 4                                                              | 2.11 |
| A_55_P1960601 | SLC4A10  | solute carrier family 4, sodium bicarbonate transporter,<br>member 10 | 2.11 |
| A_51_P212068  | AOC1     | amine oxidase, copper containing 1                                    | 2.09 |
| A_55_P1980543 | UBE2I    | ubiquitin-conjugating enzyme E2I                                      | 2.08 |
| A_55_P2167769 | ARID1A   | AT rich interactive domain 1A (SWI-like)                              | 2.08 |
| A_55_P2181602 | CALB1    | calbindin 1, 28kDa                                                    | 2.08 |
| A_51_P466910  | CACNA1G  | calcium channel, voltage-dependent, T type, alpha 1G<br>subunit       | 2.07 |
| A_55_P2038947 | LIG3     | ligase III, DNA, ATP-dependent                                        | 2.05 |
| A_52_P152219  | RPGRIP1L | RPGRIP1-like                                                          | 2.05 |
| A_52_P671676  | RASGRF1  | Ras protein-specific guanine nucleotide-releasing factor 1            | 2.05 |
| A_52_P93422   | CABIN1   | calcineurin binding protein 1                                         | 2.05 |
| A_55_P1955497 | DHCR7    | 7-dehydrocholesterol reductase                                        | 2.04 |
| A_55_P2015113 | ATG5     | autophagy related 5                                                   | 2.04 |
| A_55_P2164724 | GNAQ     | guanine nucleotide binding protein (G protein), q<br>polypeptide      | 2.04 |
| A_55_P1960994 | NLGN3    | neuroligin 3                                                          | 2.04 |

|               |          |                                                                                   |      |
|---------------|----------|-----------------------------------------------------------------------------------|------|
| A_51_P108581  | ADRBK2   | adrenergic, beta, receptor kinase 2                                               | 2.04 |
| A_52_P200617  | IARS     | isoleucyl-tRNA synthetase                                                         | 2.04 |
| A_52_P529650  | DRD2     | dopamine receptor D2                                                              | 2.03 |
| A_51_P232281  | PLA2G2D  | phospholipase A2, group IID                                                       | 2.03 |
| A_51_P124254  | COL4A1   | collagen, type IV, alpha 1                                                        | 2.02 |
| A_52_P304858  | GNB1     | guanine nucleotide binding protein (G protein), beta polypeptide 1                | 2.01 |
| A_51_P220993  | PFN1     | profilin 1                                                                        | 2    |
| A_55_P2120089 | ZMYND11  | zinc finger, MYND-type containing 11                                              | 1.99 |
| A_51_P121818  | PRKAG1   | protein kinase, AMP-activated, gamma 1 non-catalytic subunit                      | 1.99 |
| A_51_P109840  | VTN      | vitronectin                                                                       | 1.99 |
| A_52_P225898  | KCNJ8    | potassium inwardly-rectifying channel, subfamily J, member 8                      | 1.98 |
| A_52_P38627   | EGF      | epidermal growth factor                                                           | 1.98 |
| A_55_P2170409 | DOCK3    | dedicator of cytokinesis 3                                                        | 1.97 |
| A_52_P399054  | TMED2    | transmembrane emp24 domain trafficking protein 2                                  | 1.97 |
| A_52_P305658  | NTNG1    | netrin G1                                                                         | 1.97 |
| A_52_P82701   | SLC9A3   | solute carrier family 9, subfamily A (NHE3, cation proton antiporter 3), member 3 | 1.96 |
| A_51_P401343  | CLDN14   | claudin 14                                                                        | 1.95 |
| A_55_P2078040 | CACNA1B  | calcium channel, voltage-dependent, N type, alpha 1B subunit                      | 1.95 |
| A_51_P415126  | TGFA     | transforming growth factor, alpha                                                 | 1.95 |
| A_51_P307944  | S1PR4    | sphingosine-1-phosphate receptor 4                                                | 1.95 |
| A_55_P2087458 | OPRM1    | opioid receptor, mu 1                                                             | 1.94 |
| A_52_P288614  | RARS     | arginyl-tRNA synthetase                                                           | 1.94 |
| A_55_P1968129 | TCEB1    | transcription elongation factor B (SIII), polypeptide 1 (15kDa, elongin C)        | 1.94 |
| A_52_P238468  | GIPR     | gastric inhibitory polypeptide receptor                                           | 1.93 |
| A_51_P307243  | PPP5C    | protein phosphatase 5, catalytic subunit                                          | 1.93 |
| A_52_P452787  | PDCD6IP  | programmed cell death 6 interacting protein                                       | 1.93 |
| A_51_P507051  | BHLHE22  | basic helix-loop-helix family, member e22                                         | 1.93 |
| A_55_P1968068 | TP53     | tumor protein p53                                                                 | 1.92 |
| A_52_P140394  | MTMR1    | myotubularin related protein 1                                                    | 1.92 |
| A_55_P2108171 | GLUD1    | glutamate dehydrogenase 1                                                         | 1.91 |
| A_52_P68221   | GRIA3    | glutamate receptor, ionotropic, AMPA 3                                            | 1.91 |
| A_51_P396643  | NCSTN    | nicastatin                                                                        | 1.9  |
| A_51_P257550  | MARCKSL1 | MARCKS-like 1                                                                     | 1.88 |
| A_51_P397375  | GATB     | glutamyl-tRNA(Gln) amidotransferase, subunit B                                    | 1.88 |
| A_51_P279552  | CAV2     | caveolin 2                                                                        | 1.87 |
| A_55_P2027117 | RGS3     | regulator of G-protein signaling 3                                                | 1.86 |
| A_55_P1972923 | POLR1D   | polymerase (RNA) I polypeptide D, 16kDa                                           | 1.85 |
| A_55_P2130535 | DNMT3B   | DNA (cytosine-5-)-methyltransferase 3 beta                                        | 1.85 |
| A_55_P1994068 | RBP1     | retinol binding protein 1, cellular                                               | 1.84 |

|               |          |                                                                                        |      |
|---------------|----------|----------------------------------------------------------------------------------------|------|
| A_51_P432403  | FGFR2    | fibroblast growth factor receptor 2                                                    | 1.84 |
| A_55_P2167339 | CNOT3    | CCR4-NOT transcription complex, subunit 3                                              | 1.83 |
| A_66_P123282  | ZDHHC23  | zinc finger, DHHC-type containing 23                                                   | 1.83 |
| A_51_P388696  | NDUFS4   | NADH dehydrogenase (ubiquinone) Fe-S protein 4, 18kDa (NADH-coenzyme Q reductase)      | 1.82 |
| A_52_P232648  | SLC38A1  | solute carrier family 38, member 1                                                     | 1.82 |
| A_55_P2040026 | ITGA4    | integrin, alpha 4 (antigen CD49D, alpha 4 subunit of VLA-4 receptor)                   | 1.82 |
| A_52_P546459  | UBE2D1   | ubiquitin-conjugating enzyme E2D 1                                                     | 1.81 |
| A_52_P558382  | MAPK8    | mitogen-activated protein kinase 8                                                     | 1.79 |
| A_55_P2107715 | COL25A1  | collagen, type XXV, alpha 1                                                            | 1.79 |
| A_51_P230987  | PI4K2B   | phosphatidylinositol 4-kinase type 2 beta                                              | 1.78 |
| A_55_P2095663 | PGR      | progesterone receptor                                                                  | 1.78 |
| A_52_P144310  | GAD1     | glutamate decarboxylase 1 (brain, 67kDa)                                               | 1.78 |
| A_55_P2176802 | HIPK1    | homeodomain interacting protein kinase 1                                               | 1.78 |
| A_52_P456640  | FGR      | FGR proto-oncogene, Src family tyrosine kinase                                         | 1.78 |
| A_51_P452820  | RPL31    | ribosomal protein L31                                                                  | 1.77 |
| A_52_P379337  | RTN4     | reticulon 4                                                                            | 1.76 |
| A_55_P1987979 | PLRG1    | pleiotropic regulator 1                                                                | 1.76 |
| A_55_P2089942 | XPO1     | exportin 1                                                                             | 1.76 |
| A_55_P2161410 | SERPINA3 | serpin peptidase inhibitor, clade A (alpha-1 antiproteinase, antitrypsin), member 3    | 1.76 |
| A_51_P377528  | OPRK1    | opioid receptor, kappa 1                                                               | 1.75 |
| A_65_P01319   | PDE4B    | phosphodiesterase 4B, cAMP-specific                                                    | 1.75 |
| A_52_P311104  | BRD7     | bromodomain containing 7                                                               | 1.74 |
| A_55_P2061064 | GGT5     | gamma-glutamyltransferase 5                                                            | 1.74 |
| A_51_P115159  | FAM162A  | family with sequence similarity 162, member A                                          | 1.74 |
| A_52_P246165  | PTPRK    | protein tyrosine phosphatase, receptor type, K                                         | 1.74 |
| A_51_P410744  | DGKE     | diacylglycerol kinase, epsilon 64kDa                                                   | 1.73 |
| A_66_P127411  | ACAT2    | acetyl-CoA acetyltransferase 2                                                         | 1.73 |
| A_55_P2049196 | IFNA4    | interferon, alpha 4                                                                    | 1.73 |
| A_55_P2113550 | NUDT3    | nudix (nucleoside diphosphate linked moiety X)-type motif 3                            | 1.73 |
| A_52_P507214  | MMP9     | matrix metalloproteinase 9 (gelatinase B, 92kDa gelatinase, 92kDa type IV collagenase) | 1.72 |
| A_55_P2125947 | AGPAT2   | 1-acylglycerol-3-phosphate O-acyltransferase 2                                         | 1.72 |
| A_52_P584279  | PNLIP    | pancreatic lipase                                                                      | 1.72 |
| A_51_P115005  | EDN1     | endothelin 1                                                                           | 1.72 |
| A_55_P2140711 | TUFM     | Tu translation elongation factor, mitochondrial                                        | 1.7  |
| A_55_P2090330 | KCNMB4   | potassium large conductance calcium-activated channel, subfamily M, beta member 4      | 1.7  |
| A_66_P105801  | IGF1R    | insulin-like growth factor 1 receptor                                                  | 1.69 |
| A_52_P537545  | SMPD3    | sphingomyelin phosphodiesterase 3, neutral membrane (neutral sphingomyelinase II)      | 1.69 |
| A_52_P612803  | CCNG1    | cyclin G1                                                                              | 1.68 |



|               |         |                                                                                 |      |
|---------------|---------|---------------------------------------------------------------------------------|------|
| A_66_P125538  | GPC5    | glypican 5                                                                      | 1.68 |
| A_52_P229709  | UBE2D3  | ubiquitin-conjugating enzyme E2D 3                                              | 1.67 |
| A_51_P367162  | PSMB1   | proteasome (prosome, macropain) subunit, beta type, 1                           | 1.66 |
| A_55_P2168588 | CDK9    | cyclin-dependent kinase 9                                                       | 1.66 |
| A_51_P440460  | HIP1R   | huntingtin interacting protein 1 related                                        | 1.65 |
| A_51_P117604  | RAB5A   | RAB5A, member RAS oncogene family                                               | 1.62 |
| A_55_P2008687 | NLK     | nemo-like kinase                                                                | 1.62 |
| A_55_P1978511 | HLA-A   | major histocompatibility complex, class I, A                                    | 1.62 |
| A_51_P464576  | PSEN1   | presenilin 1                                                                    | 1.62 |
| A_55_P2002893 | PFKFB1  | 6-phosphofructo-2-kinase/fructose-2,6-biphosphatase 1                           | 1.61 |
| A_55_P2054897 | RND1    | Rho family GTPase 1                                                             | 1.6  |
| A_55_P2041592 | RDH16   | retinol dehydrogenase 16 (all-trans)                                            | 1.6  |
| A_51_P471025  | ABLIM1  | actin binding LIM protein 1                                                     | 1.59 |
| A_51_P132013  | CYSLTR2 | cysteinyl leukotriene receptor 2                                                | 1.58 |
| A_55_P2107854 | HNRNPK  | heterogeneous nuclear ribonucleoprotein K                                       | 1.58 |
| A_55_P2076861 | SEMA6D  | sema domain, transmembrane domain (TM), and cytoplasmic domain, (semaphorin) 6D | 1.58 |
| A_55_P2144110 | MINK1   | misshapen-like kinase 1                                                         | 1.57 |
| A_55_P2083654 | PRMT2   | protein arginine methyltransferase 2                                            | 1.51 |

**Table S5.** Down-regulated genes in the hippocampus by the combination of the ME and AX.

| Probe name    | Molecules   | ME+AX-induced downregulation                                                | Fold Change |
|---------------|-------------|-----------------------------------------------------------------------------|-------------|
|               | Gene Symbol | Description                                                                 |             |
| A_51_P412348  | SCNN1B      | sodium channel, non-voltage-gated 1, beta subunit                           | -5.00       |
| A_52_P334562  | VDR         | vitamin D (1,25- dihydroxyvitamin D3) receptor                              | -4.76       |
| A_55_P1960683 | F2          | coagulation factor II (thrombin)                                            | -4.17       |
| A_66_P136095  | CTNNA3      | catenin (cadherin-associated protein), alpha 3                              | -2.22       |
| A_55_P2071349 | TRH         | thyrotropin-releasing hormone                                               | -2.08       |
| A_51_P317176  | CSF3        | colony stimulating factor 3 (granulocyte)                                   | -1.89       |
| A_51_P212308  | CXADR       | coxsackie virus and adenovirus receptor                                     | -1.82       |
| A_55_P2184434 | EOMES       | eomesodermin                                                                | -1.70       |
| A_52_P641132  | SOX14       | SRY (sex determining region Y)-box 14                                       | -1.67       |
| A_55_P2149020 | RPL35       | ribosomal protein L35                                                       | -1.61       |
| A_55_P2077188 | STXBP1      | syntaxin binding protein 1                                                  | -1.61       |
| A_55_P2030433 | GPI         | glucose-6-phosphate isomerase                                               | -1.56       |
| A_55_P2052166 | AKAP13      | A kinase (PRKA) anchor protein 13                                           | -1.54       |
| A_55_P2027225 | FAU         | Finkel-Biskis-Reilly murine sarcoma virus (FBR-MuSV) ubiquitously expressed | -1.54       |
| A_55_P1984695 | IP6K3       | inositol hexakisphosphate kinase 3                                          | -1.49       |
| A_55_P2100705 | AUH         | AU RNA binding protein/enoyl-CoA hydratase                                  | -1.45       |
| A_52_P581594  | HTR4        | 5-hydroxytryptamine (serotonin) receptor 4, G protein-coupled               | -1.39       |

**Table S6.** Representative top molecules in the hippocampus by AX only.

| Gene name                   | Description                                              | Fold<br>change |
|-----------------------------|----------------------------------------------------------|----------------|
|                             |                                                          | SE+AX          |
| <b>UP-REGULATED GENES</b>   |                                                          |                |
| Klra4                       | killer cell lectin-like receptor, subfamily A, member 4  | 38.97          |
| IL17F                       | interleukin 17F                                          | 7.87           |
| ABHD3                       | $\alpha/\beta$ -hydrolase domain containing 3            | 7.32           |
| HRAS                        | Harvey rat sarcoma viral oncogene homolo                 | 5.30           |
| SMAD1                       | SMAD family member 1                                     | 5.21           |
| TP53BP2                     | tumor protein p53 binding protein 2                      | 4.93           |
| CHST4                       | Carbohydrate (N-acetylglycosamine 6-0) sulforansferase 4 | 4.61           |
| BTK                         | Bruton agammaglobulinemia tyrosine kinase                | 4.56           |
| CITED2                      | Cbp/p300-interacting transactivator, with Glu/Asp-rich   | 4.32           |
| GPR12                       | G protein-coupled receptor 12                            | 4.21           |
| USO24                       | ubiquitin specific peptidase 24                          | 3.86           |
| LEP                         | leptin                                                   | 3.82           |
| <b>DOWN-REGULATED GENES</b> |                                                          |                |
| CSF3                        | colony stimulating factor 3 (granulocyte)                | -4.64          |
| TRH                         | thyrotropin-releasing hormone                            | -3.15          |
| VDR                         | vitamin D (1,25-dihydroxyvitamin D3) receptor            | -3.08          |
| HOXC8                       | homeobox C8                                              | -2.83          |
| LTF                         | lactotransferrin                                         | -2.58          |
| CAV2                        | caveolin 2                                               | -2.24          |
| ACVR2B                      | activin A Receptor, Type IIB                             | -2.19          |
| PDE3A                       | phosphodiesterase 3A, CGMP-Inhibited                     | -2.09          |
| IL4                         | interleukin 4                                            | -2.01          |
| TNF                         | tumor Necrosis Factor                                    | -1.78          |
| CDKN1A                      | cyclin-Dependent Kinase Inhibitor 1A (P21, Cip1)         | -1.73          |
| OPRM1                       | Opioid Receptor Mu 1                                     | -1.73          |

**Table S7.** Protocol of mild exercise training.

| <b>Exercise protocol</b> |        |                                         |                                             |
|--------------------------|--------|-----------------------------------------|---------------------------------------------|
|                          |        | <b>Speed and time for C57BL/6J mice</b> | <b>Speed and time for <i>ob/ob</i> mice</b> |
| Week 1                   | Day 1  | 3 m/min (10 min) + 5 m/min (20 min)     | 2.5 m/min (10 min) + 4 m/min (20 min)       |
|                          | Day 2  | 5 m/min (30 min)                        | 4 m/min (30 min)                            |
|                          | Day 3  | Rest                                    | Rest                                        |
|                          | Day 4  | 5 m/min (20 min) + 7 m/min (10 min)     | 4 m/min (20 min) + 5 m/min (10 min)         |
|                          | Day 5  | 5 m/min (10 min) + 7 m/min (20 min)     | 4 m/min (10 min) + 5 m/min (20 min)         |
|                          | Day 6  | 7 m/min (30 min)                        | 5 m/min (30 min)                            |
|                          | Day 7  | Rest                                    | Rest                                        |
| Week 2                   | Day 8  | 7 m/min (30 min)                        | 5 m/min (30 min)                            |
|                          | Day 9  | 7 m/min (30 min)                        | 5 m/min (30 min)                            |
|                          | Day 10 | Rest                                    | Rest                                        |
|                          | Day 11 | 7 m/min (30 min)                        | 5 m/min (30 min)                            |
|                          | Day 12 | 7 m/min (30 min)                        | 5 m/min (30 min)                            |
|                          | Day 13 | 7 m/min (30 min)                        | 5 m/min (30 min)                            |
|                          | Day 14 | Rest                                    | Rest                                        |
| Week 3                   | Day 15 | 7 m/min (30 min)                        | 5 m/min (30 min)                            |
|                          | Day 16 | 7 m/min (30 min)                        | 5 m/min (30 min)                            |
|                          | Day 17 | Rest                                    | Rest                                        |
|                          | Day 18 | 7 m/min (30 min)                        | 5 m/min (30 min)                            |
|                          | Day 19 | 7 m/min (30 min)                        | 5 m/min (30 min)                            |
|                          | Day 20 | 7 m/min (30 min)                        | 5 m/min (30 min)                            |
|                          | Day 21 | Rest                                    | Rest                                        |
| Week 4                   | Day 22 | 7 m/min (30 min)                        | 5 m/min (30 min)                            |
|                          | Day 23 | 7 m/min (30 min)                        | 5 m/min (30 min)                            |
|                          | Day 24 | Rest                                    | Rest                                        |
|                          | Day 25 | 7 m/min (30 min)                        | 5 m/min (30 min)                            |
|                          | Day 26 | 7 m/min (30 min)                        | 5 m/min (30 min)                            |
|                          | Day 27 | 7 m/min (30 min)                        | 5 m/min (30 min)                            |
|                          | Day 28 | Rest                                    | Rest                                        |

**Table S8.** Composition of experimental diets.

| Ingredients                       | Placebo<br>(without AX) | Astaxanthin<br>(0.5% of AX) |
|-----------------------------------|-------------------------|-----------------------------|
|                                   | g/ kg of diet           |                             |
| <b><u>MF powder</u></b>           |                         |                             |
| Moisture                          | 63.75                   | 63.75                       |
| Crude protein                     | 174.75                  | 174.75                      |
| Crude fat                         | 42.00                   | 42.00                       |
| Crude fiber                       | 25.50                   | 25.50                       |
| Crude ash                         | 43.50                   | 43.50                       |
| Nitrogen-free extract             | 400.50                  | 400.50                      |
| <b><u>AstaReal powder 20F</u></b> |                         |                             |
| Starch sodium octenyl succinate   | 35.00                   | 35.00                       |
| Arabic gum                        | 18.50                   | 18.50                       |
| Mixed-tocopherol                  | 7.00                    | 7.00                        |
| Silicon dioxide                   | 2.50                    | 2.50                        |
| Glycerin-fatty acid ester         | 2.00                    | 2.00                        |
| Carboxymethyl cellulose sodium    | 2.00                    | 2.00                        |
| L-Ascorbyl palmitate ester        | 1.25                    | 1.25                        |
| Dextrin                           | 80.00                   | 80.00                       |
| Astaxanthin                       | NA                      | 101.75                      |
| Medium chain triglycerides        | 101.75                  | NA                          |

All mice received the MF powder with either AX or a placebo powder (AstaReal power 20F based on 2% content of astaxanthin derived from *Haematococcus pluvialis*; AstaReal Co. Ltd, Tokyo, Japan) at concentrations of 0.5% (wt:wt). Placebo powder for AstaReal 20F contained an equivalent amount of medium chain triglycerides instead of AX. NA: not available.

## References

1. Yook JS, et al. (2016) Astaxanthin supplementation enhances adult hippocampal neurogenesis and spatial memory in mice. *Mol Nutr Food Res* 60(3):589–599.
2. DeVos SL, Miller T (2013) Direct Intraventricular Delivery of Drugs to the Rodent Central Nervous System. *J Vis Exp* (75):1–10.
3. Hori M, et al. (2015) Unraveling the specific ischemic core and penumbra transcriptome in the permanent middle cerebral artery occlusion mouse model brain treated with the neuropeptide PACAP38. *Microarrays (Basel)* 4(1):2–24.
4. Yook JS, Shibato J, Rakwal R, Soya H (2016) DNA microarray-based experimental strategy for trustworthy expression profiling of the hippocampal genes by astaxanthin supplementation in adult mouse. *Genom Data* 7:32–37.
5. Hirano M, et al. (2006) New protein extraction/solubilization protocol for gel-based proteomics of rat (female) whole brain and brain regions. *Mol Cells* 22(1):119–125.
